# Supplementary material
Source: PubMed Central journal article supplement (PMC5068508)
Supplement: JVI.01319-16_zjv999182082so1.pdf [file JVI.01319-16_zjv999182082so1.pdf]

**Supplementary Table 1.** Mass spectrometry-based proteomics intensities of proteins in viral factories and virions

| Gene                                   | Function                                    | Mock    | Mock (SE) | 4h       | 4h (SE)  | 5.5h     | 5.5h (SE) | 7h       | 7h (SE)  | Virion   | Virion (SE) | #Pep |
|----------------------------------------|---------------------------------------------|---------|-----------|----------|----------|----------|-----------|----------|----------|----------|-------------|------|
| <b>Putative Ankyrin repeat protein</b> |                                             |         |           |          |          |          |           |          |          |          |             |      |
| L484                                   | Putative ankyrin repeat protein             | 1.1E+09 | 9.7E+07   | 2.23E+09 | 3.60E+08 | 2.01E+09 | 5.11E+08  | 2.74E+09 | 4.23E+08 | 1.62E+10 | 5.13E+09    | 31   |
| L279                                   | Putative ankyrin repeat protein             | 2.4E+07 | 1.5E+07   | 2.27E+09 | 1.60E+08 | 5.07E+09 | 1.93E+09  | 2.75E+09 | 3.55E+08 | 5.55E+07 | 4.18E+07    | 8    |
| L371                                   | Putative ankyrin repeat protein             | 6.8E+07 | 3.3E+07   | 7.01E+06 | 7.01E+06 | 4.98E+06 | 4.98E+06  | 1.11E+08 | 1.62E+07 | 1.27E+09 | 1.98E+08    | 6    |
| R601                                   | Putative ankyrin repeat protein             | 6.4E+07 | 4.8E+07   | 5.40E+08 | 6.72E+07 | 1.87E+09 | 6.22E+08  | 6.66E+08 | 2.59E+07 | 1.86E+07 | 1.11E+07    | 5    |
| R597                                   | Putative ankyrin repeat protein             | 2.9E+09 | 9.4E+08   | 1.46E+10 | 2.92E+09 | 7.22E+09 | 1.87E+09  | 2.37E+09 | 7.06E+07 | 9.30E+06 | 6.25E+05    | 4    |
| R841                                   | Putative ankyrin repeat protein             | 5.1E+07 | 6587282   | 6.00E+07 | 4.82E+06 | 4.93E+08 | 2.20E+08  | 1.49E+07 | 1.28E+07 | 2.18E+06 | 1.15E+06    | 3    |
| L56                                    | Putative ankyrin repeat protein             | 1.2E+07 | 1.2E+07   | 9.20E+08 | 1.40E+08 | 1.61E+09 | 4.00E+08  | 1.24E+09 | 2.53E+08 | 2.18E+07 | 9.29E+06    | 3    |
| R579                                   | Putative ankyrin repeat protein             | 7.7E+07 | 2.1E+07   | 1.01E+09 | 5.22E+07 | 2.63E+09 | 8.18E+08  | 1.78E+09 | 9.27E+07 | 1.00E+08 | 4.68E+07    | 3    |
| L66                                    | Putative ankyrin repeat protein             | 0       | 0         | 5.93E+08 | 6.24E+07 | 2.39E+09 | 2.04E+08  | 1.51E+09 | 3.40E+08 | 2.18E+08 | 3.94E+07    | 3    |
| R602                                   | Putative ankyrin repeat protein             | 2363283 | 2027038   | 5.88E+08 | 9.35E+07 | 1.06E+09 | 2.77E+08  | 2.51E+08 | 7.38E+07 | 0        | 0           | 2    |
| R96                                    | Putative ankyrin repeat protein             | 0       | 0         | 2.71E+07 | 4.13E+06 | 1.51E+08 | 4.38E+07  | 6.56E+06 | 4.49E+06 | 1.64E+06 | 1.38E+06    | 2    |
| R603                                   | Putative ankyrin repeat protein             | 0       | 0         | 7.37E+07 | 1.03E+07 | 3.50E+08 | 1.28E+08  | 2.38E+08 | 3.62E+07 | 1.28E+06 | 9.14E+05    | 2    |
| L483                                   | Putative ankyrin repeat protein             | 1374524 | 1374524   | 5.16E+05 | 5.16E+05 | 3.47E+08 | 1.83E+08  | 7.41E+07 | 7.00E+05 | 0        | 0           | 2    |
| L45                                    | Putative ankyrin repeat protein             | 0       | 0         | 8.70E+07 | 4.06E+07 | 4.33E+08 | 2.04E+08  | 7.72E+07 | 1.61E+07 | 3.05E+06 | 3.05E+06    | 2    |
| R634                                   | Putative ankyrin repeat protein             | 0       | 0         | 9.26E+06 | 9.94E+05 | 1.01E+08 | 5.62E+07  | 6.11E+04 | 6.11E+04 | 1.10E+06 | 1.10E+06    | 2    |
| R835                                   | Putative ankyrin repeat protein             | 58696.9 | 58696.9   | 1.67E+08 | 4.67E+06 | 5.29E+08 | 1.70E+08  | 2.19E+08 | 1.18E+07 | 2.17E+07 | 8.43E+06    | 2    |
| R551                                   | Putative ankyrin repeat protein             | 1.3E+07 | 1.3E+07   | 1.15E+08 | 2.11E+07 | 1.25E+09 | 3.47E+08  | 2.73E+09 | 9.07E+07 | 3.32E+07 | 2.93E+06    | 2    |
| L774                                   | Putative ankyrin repeat protein             | 0       | 0         | 1.37E+06 | 1.37E+06 | 6.89E+07 | 5.28E+07  | 1.30E+07 | 6.50E+06 | 0        | 0           | 2    |
| R840                                   | Putative ankyrin repeat protein             | 0       | 0         | 0        | 0        | 1.67E+08 | 8.56E+07  | 7.56E+06 | 7.56E+06 | 4.93E+06 | 4.14E+06    | 2    |
| <b>DNA processing</b>                  |                                             |         |           |          |          |          |           |          |          |          |             |      |
| R322                                   | DNA polymerase                              | 9E+07   | 3.5E+07   | 1.28E+09 | 2.25E+07 | 9.08E+09 | 6.26E+08  | 1.02E+10 | 6.39E+08 | 7.64E+07 | 4.51E+07    | 22   |
| R411                                   | Putative replication factor C large subunit | 6.2E+08 | 2.1E+08   | 4.19E+09 | 5.26E+07 | 2.58E+10 | 2.05E+09  | 4.97E+10 | 1.42E+09 | 2.06E+08 | 1.74E+07    | 18   |
| R510                                   | Putative replication factor C small subunit | 2.3E+09 | 6.6E+08   | 4.29E+09 | 4.22E+08 | 1.82E+10 | 1.64E+09  | 3.44E+10 | 2.23E+09 | 1.52E+09 | 3.35E+08    | 16   |
| R395                                   | Putative replication factor C small subunit | 7.3E+08 | 1.9E+08   | 3.31E+09 | 3.22E+08 | 2.12E+10 | 1.26E+09  | 3.35E+10 | 2.24E+09 | 1.73E+08 | 8.25E+07    | 14   |
| R303                                   | DNA ligase                                  | 1.6E+09 | 2.3E+08   | 5.78E+09 | 6.29E+08 | 1.79E+10 | 1.51E+09  | 6.33E+09 | 8.88E+08 | 5.16E+09 | 6.10E+08    | 12   |
| R545                                   | HMG box-containing protein                  | 2.3E+08 | 1.2E+08   | 1.48E+10 | 1.39E+09 | 2.60E+11 | 2.64E+10  | 4.28E+11 | 1.29E+11 | 6.46E+08 | 9.26E+07    | 11   |
| L478                                   | Putative replication factor C small subunit | 6.6E+08 | 2.1E+08   | 4.42E+09 | 4.05E+07 | 2.78E+10 | 2.23E+09  | 4.13E+10 | 6.70E+09 | 1.58E+09 | 8.57E+08    | 10   |
| L499                                   | Putative replication factor C small subunit | 8.7E+08 | 6E+08     | 1.46E+09 | 1.15E+07 | 1.31E+10 | 6.25E+08  | 2.08E+10 | 2.63E+08 | 7.73E+07 | 1.02E+07    | 9    |
| L318                                   | Probable DNA polymerase family X            | 7.7E+08 | 2.8E+07   | 1.09E+09 | 1.07E+08 | 5.63E+09 | 3.64E+08  | 7.36E+09 | 9.55E+08 | 5.90E+09 | 5.86E+08    | 8    |
| L247                                   | HNH endonuclease                            | 2.9E+08 | 1.3E+08   | 3.13E+09 | 4.99E+07 | 9.38E+09 | 2.75E+08  | 2.23E+09 | 2.15E+08 | 1.36E+08 | 1.76E+07    | 8    |
| R493                                   | Probable DNA polymerase sliding clamp       | 2.1E+07 | 1E+07     | 8.98E+08 | 4.47E+07 | 1.18E+10 | 1.10E+09  | 1.43E+10 | 1.66E+09 | 6.43E+07 | 5.14E+06    | 7    |
| R771                                   | Putative resolvase                          | 3.1E+07 | 1.9E+07   | 2.82E+08 | 2.13E+07 | 4.58E+09 | 9.44E+07  | 4.69E+09 | 6.87E+08 | 9.21E+07 | 2.86E+07    | 5    |

| Gene                 | Function                                                    | Mock    | Mock (SE) | 4h       | 4h (SE)  | 5.5h     | 5.5h (SE) | 7h       | 7h (SE)  | Virion   | Virion (SE) | #Pep |
|----------------------|-------------------------------------------------------------|---------|-----------|----------|----------|----------|-----------|----------|----------|----------|-------------|------|
| L79                  | Putative transposase                                        | 137274  | 137274    | 4.84E+07 | 1.77E+07 | 7.57E+08 | 5.33E+07  | 6.40E+08 | 1.08E+08 | 1.35E+07 | 1.33E+07    | 3    |
| L823                 | Putative proliferating cell nuclear antigen                 | 0       | 0         | 6.73E+08 | 1.80E+08 | 1.90E+09 | 6.06E+08  | 6.85E+08 | 1.97E+08 | 4.06E+07 | 2.94E+07    | 3    |
| L245                 | HNH endonuclease                                            | 0       | 0         | 8.78E+07 | 1.61E+07 | 5.96E+08 | 6.87E+07  | 7.38E+08 | 2.10E+08 | 7.17E+06 | 7.17E+06    | 2    |
| <b>DNA repair</b>    |                                                             |         |           |          |          |          |           |          |          |          |             |      |
| R555                 | Mre11/Rad50 fusion proteins                                 | 3.5E+09 | 5.7E+08   | 5.16E+09 | 1.40E+08 | 2.39E+10 | 9.67E+08  | 3.70E+10 | 1.35E+09 | 4.60E+08 | 3.91E+08    | 38   |
| L359                 | Putative DNA mismatch repair protein mutS homolog           | 1.8E+08 | 6E+07     | 6.63E+08 | 6.71E+07 | 4.34E+09 | 3.84E+08  | 2.21E+09 | 2.07E+08 | 1.49E+06 | 7.30E+05    | 9    |
| L315                 | Probable formamidopyrimidine-DNA glycosylase                | 6.4E+07 | 2.2E+07   | 5.44E+06 | 5.44E+06 | 6.06E+08 | 1.07E+08  | 8.19E+08 | 1.73E+08 | 2.04E+09 | 2.86E+08    | 4    |
| L386                 | Putative endonuclease XPG family                            | 8.3E+08 | 1E+08     | 2.20E+09 | 1.58E+08 | 1.67E+09 | 1.47E+08  | 1.82E+09 | 9.16E+07 | 3.02E+09 | 3.81E+08    | 4    |
| L687                 | Putative UV-damage endonuclease                             | 4427764 | 4427764   | 2.14E+07 | 9.26E+06 | 6.79E+07 | 2.31E+07  | 1.27E+08 | 3.21E+07 | 1.05E+09 | 2.63E+08    | 2    |
| <b>DNA topology</b>  |                                                             |         |           |          |          |          |           |          |          |          |             |      |
| R480                 | DNA topoisomerase 2                                         | 3.8E+08 | 6E+07     | 1.04E+10 | 9.92E+08 | 1.39E+11 | 8.76E+09  | 2.71E+11 | 2.47E+10 | 1.01E+09 | 2.89E+08    | 59   |
| R345                 | Putative regulator of chromosome condensation (RCC1 domain) | 1E+11   | 2.9E+10   | 1.87E+10 | 1.50E+10 | 8.67E+10 | 7.47E+10  | 3.62E+11 | 8.42E+10 | 1.15E+12 | 2.15E+11    | 45   |
| L221                 | DNA topoisomerase 1 type prokaryotic                        | 2.2E+07 | 1.1E+07   | 6.62E+08 | 1.00E+08 | 1.81E+09 | 1.17E+08  | 5.35E+09 | 1.15E+09 | 9.60E+09 | 4.60E+08    | 15   |
| R194                 | DNA topoisomerase 1B                                        | 4676673 | 2480676   | 1.05E+08 | 5.04E+07 | 6.61E+07 | 2.05E+07  | 1.20E+09 | 2.27E+08 | 9.99E+09 | 1.21E+09    | 7    |
| <b>Fibrils</b>       |                                                             |         |           |          |          |          |           |          |          |          |             |      |
| L725                 | Uncharacterized protein                                     | 3E+09   | 1.1E+09   | 3.56E+09 | 5.95E+08 | 7.63E+09 | 2.94E+09  | 1.32E+11 | 7.70E+09 | 1.32E+12 | 6.49E+10    | 17   |
| L829                 | Uncharacterized protein                                     | 9.6E+07 | 3.3E+07   | 1.98E+08 | 8.69E+07 | 6.86E+07 | 2.51E+07  | 4.60E+09 | 9.28E+08 | 3.99E+10 | 1.76E+10    | 15   |
| R135                 | Putative GMC-type oxidoreductase (1 TMD )                   | 1.1E+08 | 2.5E+07   | 1.95E+08 | 4.05E+07 | 6.75E+07 | 3.22E+07  | 1.49E+08 | 3.07E+07 | 7.57E+09 | 4.28E+09    | 13   |
| <b>Glycosylation</b> |                                                             |         |           |          |          |          |           |          |          |          |             |      |
| L444                 | Putative ADP-ribosyl glycohydrolase                         | 2.8E+07 | 2.8E+07   | 9.09E+07 | 3.42E+07 | 3.65E+08 | 2.15E+08  | 5.05E+08 | 2.69E+07 | 3.16E+09 | 3.44E+08    | 6    |
| R707                 | P13-like protein (1 TMD )                                   | 2.8E+07 | 1.4E+07   | 2.70E+08 | 2.85E+07 | 3.28E+08 | 6.33E+07  | 6.53E+07 | 2.17E+07 | 3.38E+09 | 9.55E+07    | 5    |
| L373                 | Glycosyltransferase (1 TMD )                                | 5.9E+07 | 2.6E+07   | 4.78E+08 | 1.17E+08 | 3.35E+08 | 7.16E+07  | 7.69E+08 | 5.95E+07 | 6.69E+09 | 9.55E+08    | 4    |
| <b>Helicases</b>     |                                                             |         |           |          |          |          |           |          |          |          |             |      |
| L377                 | Putative ATP-dependent RNA helicase                         | 1.3E+08 | 6.9E+07   | 3.36E+08 | 4.18E+07 | 6.76E+08 | 2.43E+08  | 3.05E+09 | 2.90E+08 | 2.07E+10 | 2.30E+09    | 33   |
| L206/<br>L207        | Putative helicase                                           | 3E+09   | 2.6E+08   | 1.63E+10 | 2.53E+08 | 6.16E+10 | 6.08E+09  | 2.00E+10 | 3.33E+09 | 9.43E+08 | 2.86E+08    | 33   |
| R350                 | Putative ATP-dependent RNA helicase                         | 3.4E+08 | 1.4E+08   | 1.14E+09 | 2.39E+08 | 8.73E+08 | 3.77E+08  | 4.44E+09 | 4.89E+08 | 4.59E+10 | 5.26E+09    | 25   |
| L540                 | Putative ATP-dependent RNA helicase                         | 3.5E+08 | 7.7E+07   | 2.89E+08 | 8.69E+07 | 3.13E+08 | 1.23E+08  | 1.77E+09 | 2.63E+08 | 1.92E+10 | 2.83E+09    | 17   |
| R366                 | Putative ATP-dependent RNA helicase                         | 1.1E+08 | 2.1E+07   | 2.74E+08 | 3.70E+07 | 2.43E+08 | 1.91E+07  | 1.94E+08 | 2.19E+07 | 1.97E+09 | 3.56E+08    | 17   |
| R592                 | Putative helicase                                           | 2E+09   | 7.7E+08   | 6.21E+09 | 6.26E+08 | 4.13E+10 | 4.24E+09  | 7.49E+10 | 4.08E+09 | 1.83E+08 | 5.74E+07    | 15   |
| R568                 | Putative ATP-dependent DNA helicase                         | 2.3E+08 | 7.4E+07   | 2.39E+09 | 1.20E+08 | 1.15E+10 | 7.22E+08  | 1.40E+10 | 2.70E+09 | 8.43E+08 | 9.10E+07    | 11   |
| L115                 | Putative helicase                                           | 5.5E+08 | 3.9E+08   | 4.59E+08 | 6.67E+07 | 1.40E+09 | 1.39E+08  | 2.01E+09 | 1.67E+08 | 3.03E+07 | 8.70E+06    | 11   |

| Gene                                          | Function                                                  | Mock    | Mock (SE) | 4h       | 4h (SE)  | 5.5h     | 5.5h (SE) | 7h       | 7h (SE)  | Virion   | Virion (SE) | #Pep |
|-----------------------------------------------|-----------------------------------------------------------|---------|-----------|----------|----------|----------|-----------|----------|----------|----------|-------------|------|
| R563                                          | Putative ATP-dependent RNA helicase                       | 8.4E+07 | 4.2E+07   | 1.50E+08 | 2.11E+07 | 1.61E+08 | 3.36E+07  | 1.05E+09 | 2.03E+08 | 7.94E+09 | 7.16E+08    | 9    |
| L538                                          | Putative ATP-dependent RNA helicase                       | 5.1E+08 | 2.4E+08   | 1.25E+09 | 1.80E+08 | 7.88E+08 | 1.01E+08  | 6.99E+08 | 8.98E+07 | 6.18E+09 | 7.15E+08    | 7    |
| L396                                          | Putative ATP-dependent RNA helicase                       | 1E+07   | 3490373   | 2.81E+08 | 9.62E+06 | 8.82E+09 | 1.28E+09  | 1.42E+10 | 1.28E+09 | 1.45E+07 | 5.87E+06    | 7    |
| R290                                          | Putative ATP-dependent RNA helicase                       | 4.3E+07 | 2459469   | 1.09E+09 | 5.11E+07 | 3.76E+09 | 6.66E+08  | 2.34E+09 | 3.54E+08 | 1.27E+08 | 6.36E+07    | 6    |
| R458                                          | Putative helicase                                         | 2.3E+09 | 8.5E+08   | 1.08E+10 | 6.93E+08 | 7.20E+09 | 9.58E+08  | 2.13E+09 | 4.52E+08 | 4.79E+07 | 5.07E+06    | 6    |
| L364                                          | Putative ATP-dependent RNA helicase                       | 6.5E+07 | 9496514   | 2.36E+09 | 1.50E+08 | 1.25E+10 | 1.86E+09  | 7.34E+09 | 6.78E+08 | 2.61E+07 | 1.35E+07    | 5    |
| <b>Hydrolases</b>                             |                                                           |         |           |          |          |          |           |          |          |          |             |      |
| R526                                          | Putative alpha/beta hydrolase                             | 1.9E+08 | 2.8E+07   | 3.52E+08 | 7.17E+07 | 4.63E+08 | 6.46E+07  | 9.99E+09 | 8.61E+08 | 1.31E+11 | 1.71E+10    | 9    |
| R325                                          | Metal dependent hydrolase                                 | 1098171 | 1098171   | 7.27E+07 | 3.72E+07 | 6.17E+07 | 4.31E+07  | 1.59E+07 | 1.59E+07 | 2.92E+08 | 1.99E+07    | 2    |
| <b>Lipid modification</b>                     |                                                           |         |           |          |          |          |           |          |          |          |             |      |
| L323                                          | Myristoylated membrane protein (2 TMD)                    | 2.6E+08 | 5.3E+07   | 1.09E+09 | 2.02E+08 | 3.83E+08 | 4.74E+07  | 1.31E+10 | 1.73E+09 | 8.38E+10 | 5.34E+09    | 7    |
| R398                                          | Putative phosphoesterase (1 TMD)                          | 1.9E+08 | 1.3E+07   | 3.08E+08 | 9.04E+07 | 2.44E+08 | 9.20E+07  | 1.28E+09 | 1.66E+08 | 7.06E+09 | 5.00E+08    | 5    |
| L446                                          | Putative patatin-like phospholipase (1 TMD)               | 2.3E+07 | 1.4E+07   | 1.06E+08 | 1.06E+08 | 1.57E+08 | 8.12E+07  | 3.18E+09 | 1.04E+08 | 4.00E+07 | 2.03E+07    | 5    |
| <b>Membrane-related</b>                       |                                                           |         |           |          |          |          |           |          |          |          |             |      |
| R644                                          | Phosphatidylethanolamine-binding protein                  | 1.2E+07 | 1.2E+07   | 5.62E+07 | 4.24E+06 | 1.50E+08 | 7.03E+07  | 3.42E+08 | 1.11E+08 | 1.13E+10 | 1.71E+09    | 5    |
| R877                                          | Putative lipocalin                                        | 5.6E+07 | 1.1E+07   | 1.23E+08 | 3.61E+07 | 1.09E+08 | 1.91E+07  | 1.88E+09 | 2.20E+08 | 1.24E+10 | 1.46E+09    | 4    |
| L808                                          | Probable lanosterol 14-alpha demethylase                  | 2.5E+07 | 1.3E+07   | 9.44E+07 | 3.12E+06 | 5.54E+08 | 2.18E+08  | 5.01E+08 | 1.40E+08 | 7.57E+05 | 4.05E+05    | 2    |
| <b>Methyltransferases</b>                     |                                                           |         |           |          |          |          |           |          |          |          |             |      |
| R383                                          | Putative FtsJ-like methyltransferase                      | 1.8E+08 | 8337883   | 1.08E+09 | 2.02E+08 | 6.03E+08 | 4.68E+07  | 3.84E+09 | 1.66E+08 | 3.41E+10 | 3.45E+09    | 11   |
| L511                                          | Putative FtsJ-like methyltransferase                      | 1.1E+08 | 4.7E+07   | 4.13E+08 | 6.01E+07 | 5.17E+09 | 2.66E+08  | 1.12E+10 | 1.22E+09 | 5.34E+09 | 8.88E+08    | 6    |
| <b>Motility</b>                               |                                                           |         |           |          |          |          |           |          |          |          |             |      |
| L294                                          | Kinesin-like protein                                      | 3.8E+09 | 3.4E+09   | 2.20E+09 | 1.45E+08 | 9.29E+09 | 1.05E+09  | 1.32E+10 | 2.94E+08 | 3.71E+10 | 4.89E+09    | 83   |
| R721                                          | Putative chemotaxis protein CheD                          | 1.5E+09 | 4.3E+08   | 2.23E+09 | 6.66E+08 | 3.08E+09 | 1.33E+09  | 2.48E+09 | 4.65E+08 | 1.91E+10 | 1.83E+09    | 8    |
| <b>Nucleases</b>                              |                                                           |         |           |          |          |          |           |          |          |          |             |      |
| R528                                          | Putative 5'-3' exonuclease                                | 3.5E+07 | 2.4E+07   | 4.60E+08 | 3.91E+07 | 4.40E+09 | 3.85E+08  | 4.84E+09 | 4.28E+08 | 6.95E+09 | 1.05E+09    | 11   |
| R354                                          | Putative phage-type endonuclease                          | 6.3E+07 | 3.8E+07   | 7.51E+07 | 8.11E+06 | 1.88E+09 | 2.44E+08  | 2.35E+09 | 3.13E+08 | 5.53E+07 | 2.92E+07    | 4    |
| R502                                          | Putative intron encoded endonuclease                      | 5.7E+07 | 2.9E+07   | 6.86E+08 | 3.73E+07 | 4.07E+09 | 1.53E+08  | 3.25E+09 | 2.76E+08 | 3.94E+05 | 3.80E+05    | 3    |
| R569                                          | Uncharacterized exonuclease                               | 2E+07   | 1.1E+07   | 1.67E+08 | 3.46E+07 | 9.49E+08 | 1.55E+08  | 8.31E+08 | 1.23E+08 | 5.92E+06 | 2.80E+06    | 2    |
| <b>Nucleotide synthesis and modifications</b> |                                                           |         |           |          |          |          |           |          |          |          |             |      |
| R512                                          | Deoxynucleotide monophosphate kinase                      | 7.4E+08 | 1.3E+08   | 2.16E+09 | 1.49E+08 | 4.96E+09 | 1.10E+09  | 6.14E+09 | 4.14E+08 | 5.29E+07 | 1.71E+07    | 5    |
| L258                                          | Thymidine kinase                                          | 1.4E+08 | 7.6E+07   | 6.93E+08 | 6.14E+07 | 1.47E+09 | 3.59E+08  | 9.74E+08 | 3.62E+07 | 4.39E+05 | 2.21E+05    | 3    |
| R497                                          | Bifunctional dihydrofolate reductase-thymidylate synthase | 0       | 0         | 1.77E+07 | 3.92E+06 | 1.94E+08 | 9.25E+07  | 8.34E+07 | 5.12E+05 | 0        | 0           | 2    |

| Gene                         | Function                                               | Mock    | Mock (SE) | 4h       | 4h (SE)  | 5.5h     | 5.5h (SE) | 7h       | 7h (SE)  | Virion   | Virion (SE) | #Pep |
|------------------------------|--------------------------------------------------------|---------|-----------|----------|----------|----------|-----------|----------|----------|----------|-------------|------|
| <b>Oxidation, Reduction</b>  |                                                        |         |           |          |          |          |           |          |          |          |             |      |
| R362                         | Thioredoxin domain-containing protein                  | 5.4E+08 | 1.3E+07   | 7.07E+08 | 9.92E+07 | 9.26E+08 | 2.09E+08  | 7.20E+10 | 1.27E+10 | 7.32E+11 | 5.68E+10    | 43   |
| R596                         | Probable FAD-linked sulfhydryl oxidase                 | 9.6E+07 | 2.5E+07   | 3.28E+08 | 1.63E+08 | 1.83E+08 | 9.87E+07  | 1.51E+10 | 1.42E+09 | 4.78E+10 | 4.92E+09    | 13   |
| L498                         | Probable zinc-type alcohol dehydrogenase-like protein  | 3.8E+08 | 1.3E+08   | 8.84E+08 | 7.17E+07 | 6.06E+08 | 4.54E+07  | 1.31E+10 | 1.08E+09 | 3.19E+10 | 5.01E+09    | 13   |
| R443                         | Thioredoxin domain-containing protein (1 TMD)          | 5.2E+08 | 1.2E+08   | 5.82E+08 | 6.13E+07 | 7.86E+08 | 1.20E+08  | 1.87E+10 | 2.61E+09 | 1.93E+11 | 5.19E+09    | 8    |
| R195                         | Probable glutaredoxin                                  | 1.1E+09 | 5E+07     | 3.29E+09 | 7.38E+08 | 2.80E+09 | 4.81E+08  | 1.72E+09 | 7.61E+08 | 4.12E+10 | 4.69E+09    | 4    |
| R419                         | Short-chain type dehydrogenase/reductase               | 7.4E+07 | 4.1E+07   | 5.02E+07 | 1.00E+07 | 3.86E+07 | 7.59E+06  | 3.19E+06 | 3.06E+06 | 1.94E+09 | 7.91E+07    | 4    |
| L894                         | Truncated GMC-type inactive oxidoreductase             | 2.2E+08 | 1.1E+08   | 1.18E+08 | 4.74E+07 | 6.56E+07 | 1.87E+07  | 2.92E+08 | 1.58E+08 | 7.81E+08 | 5.30E+08    | 4    |
| R368                         | Probable FAD-linked sulfhydryl oxidase (1 TMD)         | 7.9E+07 | 3.9E+07   | 8.57E+08 | 4.20E+07 | 1.91E+09 | 2.39E+08  | 3.74E+09 | 2.46E+08 | 5.06E+09 | 6.40E+08    | 2    |
| R548                         | Thioredoxin-like protein                               | 313438  | 313438    | 6.72E+04 | 6.72E+04 | 4.07E+06 | 1.74E+06  | 0        | 0        | 3.39E+08 | 2.59E+07    | 2    |
| <b>Proteolysis</b>           |                                                        |         |           |          |          |          |           |          |          |          |             |      |
| L251                         | Lon protease homolog                                   | 0       | 0         | 2.49E+07 | 1.48E+07 | 3.20E+08 | 7.33E+07  | 1.16E+10 | 1.06E+09 | 8.93E+07 | 7.17E+07    | 16   |
| R521                         | Probable ubiquitin-conjugating enzyme E2 (1 TMD)       | 6.6E+07 | 3.5E+07   | 4.92E+09 | 5.17E+08 | 2.15E+10 | 2.72E+09  | 1.72E+10 | 8.27E+08 | 9.69E+07 | 1.90E+07    | 15   |
| R722                         | Putative bifunctional metalloprotease/ubiquitin-ligase | 8.3E+07 | 4.1E+07   | 3.62E+08 | 5.94E+07 | 4.42E+08 | 2.05E+08  | 3.49E+09 | 4.58E+08 | 2.08E+10 | 2.66E+09    | 12   |
| R700                         | Serpin-like protein                                    | 1.2E+08 | 3.5E+07   | 4.32E+08 | 9.26E+07 | 3.41E+08 | 1.42E+08  | 9.14E+08 | 9.13E+07 | 5.11E+09 | 5.78E+08    | 11   |
| R811                         | Putative ariadne-like RING finger protein              | 2.5E+08 | 1.9E+08   | 1.82E+09 | 1.07E+08 | 3.66E+09 | 6.98E+08  | 3.15E+09 | 2.98E+08 | 4.74E+07 | 3.51E+07    | 10   |
| R355                         | Putative thiol protease                                | 1.2E+08 | 3.9E+07   | 2.57E+08 | 3.74E+07 | 2.44E+08 | 6.23E+07  | 5.96E+08 | 8.42E+07 | 7.89E+09 | 1.48E+09    | 9    |
| L293                         | Putative ubiquitin carboxyl-terminal hydrolase         | 1.3E+08 | 6.1E+07   | 1.41E+08 | 5.02E+07 | 1.43E+08 | 9.47E+07  | 4.47E+08 | 3.53E+07 | 1.00E+10 | 3.55E+08    | 6    |
| R337                         | Uncharacterized cullin-like protein                    | 5.2E+08 | 1.5E+08   | 8.85E+09 | 8.60E+08 | 4.64E+10 | 6.27E+09  | 5.88E+10 | 7.58E+09 | 5.33E+08 | 2.96E+08    | 6    |
| L709                         | Probable ubiquitin-conjugating enzyme E2               | 6E+07   | 6E+07     | 1.99E+06 | 1.01E+06 | 4.37E+08 | 1.65E+08  | 2.72E+08 | 2.42E+07 | 9.45E+05 | 9.45E+05    | 3    |
| L233                         | Putative Zinc protease                                 | 3705988 | 3705988   | 6.00E+07 | 3.40E+07 | 1.99E+07 | 7.62E+06  | 8.94E+07 | 4.30E+07 | 1.07E+09 | 4.94E+07    | 3    |
| R795                         | Probable bifunctional E2/E3 enzyme                     | 8.9E+07 | 3E+07     | 4.69E+08 | 5.53E+07 | 6.44E+08 | 1.74E+08  | 3.46E+08 | 8.28E+07 | 4.24E+07 | 1.55E+07    | 2    |
| <b>Protein folding</b>       |                                                        |         |           |          |          |          |           |          |          |          |             |      |
| L393                         | Heat shock 70 kDa protein homolog                      | 2E+07   | 2E+07     | 8.86E+05 | 4.43E+05 | 8.60E+07 | 3.81E+07  | 6.06E+08 | 5.78E+07 | 1.59E+06 | 1.08E+06    | 3    |
| R445                         | Putative J domain-containing protein                   | 4681699 | 4681699   | 4.31E+07 | 2.17E+07 | 1.67E+08 | 2.56E+07  | 1.42E+09 | 2.37E+08 | 7.68E+08 | 1.06E+08    | 2    |
| <b>Protein modifications</b> |                                                        |         |           |          |          |          |           |          |          |          |             |      |
| R679                         | Putative serine/threonine-protein kinase               | 3E+09   | 1.1E+09   | 2.02E+10 | 4.08E+09 | 1.06E+10 | 3.28E+09  | 4.42E+09 | 6.08E+08 | 1.32E+10 | 1.71E+09    | 17   |
| L593                         | Putative prolyl 4-hydroxylase                          | 5.8E+08 | 4.6E+08   | 5.24E+08 | 7.52E+07 | 6.32E+08 | 8.82E+07  | 2.94E+09 | 2.83E+08 | 2.68E+10 | 3.60E+09    | 10   |
| R400                         | Putative serine/threonine-protein kinase               | 7569083 | 7569083   | 1.42E+08 | 1.40E+07 | 2.62E+08 | 1.27E+08  | 1.25E+09 | 2.77E+08 | 2.05E+09 | 4.65E+08    | 6    |
| R301                         | Putative serine/threonine-protein kinase               | 3.4E+07 | 1.9E+07   | 1.70E+08 | 1.90E+07 | 1.33E+08 | 4.64E+07  | 1.75E+09 | 4.19E+08 | 8.03E+09 | 2.78E+09    | 5    |

| Gene                       | Function                                         | Mock    | Mock (SE) | 4h       | 4h (SE)  | 5.5h     | 5.5h (SE) | 7h       | 7h (SE)  | Virion   | Virion (SE) | #Pep |
|----------------------------|--------------------------------------------------|---------|-----------|----------|----------|----------|-----------|----------|----------|----------|-------------|------|
| R306                       | Serine/Threonine phosphatase                     | 3.8E+08 | 4.9E+07   | 6.51E+07 | 2.53E+07 | 3.68E+08 | 4.41E+07  | 2.57E+09 | 3.30E+08 | 1.34E+10 | 1.95E+09    | 4    |
| L605                       | Structural PPlase-like protein                   | 2.1E+07 | 1.1E+07   | 0        | 0        | 2.31E+05 | 2.31E+05  | 2.58E+08 | 7.04E+07 | 1.80E+09 | 2.12E+08    | 2    |
| R622                       | Putative tyrosine-protein phosphatase            | 3530402 | 2101691   | 1.79E+07 | 1.19E+07 | 1.55E+07 | 2.50E+06  | 0        | 0        | 9.55E+08 | 1.85E+08    | 2    |
| L205                       | Putative serine/threonine-protein kinase         | 48786.7 | 48786.7   | 8.00E+07 | 4.73E+06 | 4.88E+08 | 1.23E+08  | 3.98E+08 | 1.99E+07 | 3.39E+07 | 4.71E+06    | 2    |
| <b>Protein motifs</b>      |                                                  |         |           |          |          |          |           |          |          |          |             |      |
| L4                         | Putative Kila-N domain-containing protein        | 1.7E+09 | 6.7E+08   | 5.66E+10 | 5.97E+08 | 8.40E+10 | 1.04E+10  | 5.43E+10 | 5.39E+09 | 9.72E+09 | 7.55E+08    | 18   |
| L264                       | WD repeat-containing protein                     | 1.4E+08 | 6.8E+07   | 1.51E+09 | 2.09E+08 | 1.26E+09 | 2.56E+08  | 9.72E+09 | 6.46E+08 | 3.16E+10 | 2.48E+09    | 17   |
| L520                       | Putative BTB/POZ domain-containing protein       | 6E+07   | 1.3E+07   | 2.45E+08 | 2.71E+07 | 2.80E+08 | 7.33E+07  | 2.66E+09 | 3.08E+08 | 5.02E+08 | 1.39E+08    | 9    |
| L887                       | Putative JmjC domain-containing protein (1 TMD ) | 1.4E+08 | 1.3E+08   | 1.18E+08 | 2.18E+07 | 1.67E+08 | 3.61E+07  | 1.06E+09 | 2.04E+08 | 8.15E+09 | 7.60E+08    | 9    |
| R307                       | PP2C-like domain-containing protein              | 1.8E+08 | 1.5E+08   | 1.71E+08 | 4.36E+07 | 7.85E+08 | 3.69E+07  | 4.57E+09 | 4.76E+08 | 1.90E+10 | 2.17E+09    | 8    |
| L775                       | Putative PAN domain-containing protein           | 2E+09   | 5.4E+08   | 9.08E+09 | 1.31E+09 | 4.62E+09 | 1.04E+09  | 2.85E+09 | 2.24E+08 | 2.24E+10 | 4.06E+09    | 7    |
| R508                       | Putative SWIB domain-containing protein          | 9.4E+07 | 6.7E+07   | 1.39E+08 | 4.63E+07 | 5.71E+10 | 3.04E+09  | 9.48E+10 | 1.63E+10 | 4.80E+08 | 2.23E+08    | 6    |
| L37                        | Putative Kila-N domain-containing protein        | 3.5E+08 | 7.5E+07   | 1.23E+10 | 1.51E+08 | 1.45E+10 | 2.88E+09  | 5.86E+09 | 5.65E+08 | 3.86E+08 | 2.77E+08    | 6    |
| R486                       | Putative PAN domain-containing protein           | 7.1E+07 | 2.1E+07   | 1.53E+08 | 8.97E+07 | 3.11E+08 | 1.13E+08  | 1.48E+10 | 2.90E+09 | 7.01E+10 | 3.27E+10    | 3    |
| R878                       | Putative Kila-N domain-containing protein        | 0       | 0         | 6.51E+08 | 2.28E+07 | 2.39E+09 | 5.75E+08  | 1.62E+09 | 5.24E+07 | 2.13E+07 | 2.01E+07    | 3    |
| R904                       | Putative Kila-N domain-containing protein        | 2.3E+07 | 1.8E+07   | 1.63E+09 | 1.33E+08 | 8.46E+08 | 7.79E+07  | 9.77E+07 | 3.94E+07 | 1.07E+06 | 5.97E+05    | 2    |
| L394                       | Putative HD domain-containing protein            | 8819693 | 5923702   | 1.74E+07 | 1.66E+06 | 2.97E+08 | 1.51E+08  | 2.44E+07 | 8.67E+06 | 4.75E+02 | 4.75E+02    | 2    |
| L89                        | Putative BTB/POZ domain-containing protein       | 0       | 0         | 5.40E+08 | 9.01E+07 | 7.02E+08 | 2.08E+08  | 1.41E+08 | 5.51E+07 | 7.78E+06 | 1.59E+06    | 2    |
| L168                       | Putative F-box protein                           | 0       | 0         | 3.58E+06 | 1.85E+06 | 2.57E+08 | 1.09E+08  | 2.30E+07 | 4.11E+06 | 1.78E+05 | 1.78E+05    | 2    |
| R850                       | Putative sel1-like repeat-containing protein     | 0       | 0         | 5.84E+08 | 8.39E+07 | 6.63E+08 | 2.36E+08  | 1.91E+08 | 4.05E+07 | 2.85E+08 | 1.31E+08    | 2    |
| <b>Structural proteins</b> |                                                  |         |           |          |          |          |           |          |          |          |             |      |
| L410                       | Putative core protein                            | 1E+09   | 4.7E+08   | 1.97E+09 | 2.83E+08 | 3.58E+09 | 5.47E+08  | 9.54E+10 | 6.95E+09 | 7.02E+11 | 4.92E+10    | 59   |
| L425                       | Capsid protein 1                                 | 3.5E+10 | 3.9E+09   | 2.87E+10 | 7.31E+09 | 4.22E+10 | 1.41E+10  | 6.23E+11 | 4.26E+10 | 1.71E+12 | 2.04E+11    | 43   |
| L71                        | Collagen-like protein 1                          | 2E+09   | 6.6E+08   | 3.01E+09 | 4.66E+08 | 4.66E+09 | 5.86E+08  | 1.47E+10 | 1.27E+09 | 2.42E+11 | 6.45E+10    | 7    |
| L669                       | Collagen-like protein 7                          | 1.3E+07 | 1.3E+07   | 1.29E+09 | 1.03E+09 | 1.80E+09 | 1.65E+09  | 3.46E+09 | 4.97E+08 | 3.45E+10 | 1.47E+10    | 4    |
| L668                       | Collagen-like protein 6                          | 0       | 0         | 0        | 0        | 2.06E+06 | 2.06E+06  | 1.49E+08 | 2.85E+07 | 1.40E+09 | 6.80E+08    | 2    |
| R440                       | Probable capsid protein 3                        | 0       | 0         | 0        | 0        | 1.70E+06 | 8.88E+05  | 1.01E+08 | 3.43E+07 | 5.57E+07 | 2.85E+07    | 2    |
| <b>Transcription</b>       |                                                  |         |           |          |          |          |           |          |          |          |             |      |
| R501                       | DNA-directed RNA polymerase subunit 1            | 8.5E+09 | 5.4E+08   | 1.80E+10 | 4.81E+09 | 2.46E+10 | 5.18E+09  | 2.41E+10 | 3.98E+09 | 2.58E+10 | 1.25E+09    | 53   |
| L244                       | DNA-directed RNA polymerase subunit 2            | 9.6E+08 | 4.2E+08   | 2.87E+09 | 2.24E+08 | 1.79E+10 | 9.78E+08  | 2.05E+10 | 2.73E+09 | 4.04E+10 | 4.68E+09    | 33   |
| R382                       | Probable mRNA-capping                            | 1.4E+08 | 1.2E+08   | 2.87E+08 | 1.12E+08 | 4.41E+08 | 1.47E+08  | 6.16E+09 | 9.85E+08 | 3.86E+10 | 4.41E+09    | 32   |

| Gene                   | Function                                           | Mock    | Mock (SE) | 4h       | 4h (SE)  | 5.5h     | 5.5h (SE) | 7h       | 7h (SE)  | Virion   | Virion (SE) | #Pep |
|------------------------|----------------------------------------------------|---------|-----------|----------|----------|----------|-----------|----------|----------|----------|-------------|------|
|                        | enzyme                                             |         |           |          |          |          |           |          |          |          |             |      |
| R341                   | Putative poly(A) polymerase catalytic subunit      | 5.3E+08 | 4.8E+08   | 3.58E+08 | 7.49E+07 | 3.19E+08 | 4.52E+07  | 1.55E+09 | 1.92E+08 | 2.36E+10 | 2.77E+09    | 15   |
| R470                   | Putative DNA directed RNA polymerase subunit       | 2.1E+08 | 4.4E+07   | 1.56E+09 | 2.28E+08 | 1.92E+10 | 2.50E+09  | 3.09E+10 | 2.16E+09 | 2.92E+10 | 3.36E+09    | 13   |
| L376                   | Putative DNA-directed RNA polymerase subunit       | 1.4E+09 | 9.6E+07   | 3.20E+09 | 1.80E+08 | 9.77E+09 | 9.58E+08  | 1.40E+10 | 2.23E+09 | 2.45E+10 | 3.55E+09    | 9    |
| L235                   | DNA-directed RNA polymerase subunit 5              | 1.4E+09 | 2.6E+08   | 6.00E+08 | 1.71E+08 | 1.18E+10 | 1.19E+09  | 2.82E+10 | 5.44E+09 | 3.07E+10 | 6.55E+09    | 8    |
| L308                   | Putative mRNA capping enzyme                       | 1.3E+08 | 5.3E+07   | 2.85E+08 | 9.57E+07 | 4.55E+09 | 3.54E+08  | 5.40E+09 | 5.32E+08 | 1.83E+08 | 6.05E+07    | 8    |
| L208                   | Putative DNA-dependent RNA polymerase subunit Rpb9 | 2.2E+09 | 6.2E+08   | 7.59E+09 | 3.48E+08 | 1.44E+10 | 8.07E+08  | 2.19E+10 | 3.87E+09 | 2.98E+10 | 3.52E+09    | 6    |
| R429                   | Putative transcription factor                      | 7.6E+07 | 5E+07     | 1.02E+08 | 6.12E+07 | 2.62E+09 | 2.28E+08  | 5.89E+09 | 7.55E+08 | 2.79E+07 | 1.92E+07    | 5    |
| R559                   | Uncharacterized HTH-type transcriptional regulator | 2.6E+07 | 7571653   | 1.95E+08 | 1.77E+07 | 2.03E+09 | 5.60E+08  | 3.79E+09 | 6.50E+08 | 3.43E+08 | 5.81E+07    | 4    |
| R453                   | TATA-box-binding protein-like                      | 3.7E+07 | 1.9E+07   | 2.70E+09 | 1.45E+08 | 6.83E+09 | 1.02E+09  | 1.79E+09 | 1.06E+08 | 1.58E+07 | 7.92E+06    | 4    |
| R209                   | DNA-directed RNA polymerase subunit 6              | 2E+08   | 1E+08     | 2.08E+08 | 3.53E+07 | 1.88E+09 | 4.55E+07  | 1.98E+09 | 4.63E+08 | 3.71E+09 | 3.57E+08    | 4    |
| L250                   | Putative transcription initiation factor IIB-like  | 1774877 | 1774877   | 1.39E+09 | 4.42E+07 | 8.27E+09 | 8.91E+08  | 6.81E+09 | 4.60E+08 | 9.43E+09 | 1.79E+09    | 3    |
| <b>tRNA -related</b>   |                                                    |         |           |          |          |          |           |          |          |          |             |      |
| R663                   | Arginyl-tRNA synthetase                            | 1.6E+07 | 1.1E+07   | 3.34E+08 | 1.70E+08 | 3.16E+08 | 1.08E+08  | 9.94E+07 | 1.40E+07 | 1.48E+06 | 1.48E+06    | 2    |
| R639                   | Methionyl-tRNA synthetase                          | 240586  | 240586    | 2.42E+07 | 1.05E+07 | 5.94E+08 | 1.99E+08  | 4.62E+08 | 8.41E+07 | 3.58E+06 | 1.79E+06    | 2    |
| <b>Others</b>          |                                                    |         |           |          |          |          |           |          |          |          |             |      |
| R476                   | Putative AAA family ATPase                         | 2.2E+08 | 5.1E+07   | 6.74E+10 | 2.97E+09 | 2.26E+11 | 2.24E+10  | 1.30E+11 | 9.12E+09 | 3.18E+08 | 5.24E+07    | 37   |
| R584                   | N-acetyltransferase                                | 1E+08   | 2E+07     | 7.89E+08 | 8.33E+07 | 1.15E+09 | 1.01E+08  | 2.40E+10 | 1.93E+09 | 1.37E+11 | 2.10E+10    | 17   |
| R624                   | Putative GTP-binding protein                       | 5.4E+07 | 2.5E+07   | 7.21E+09 | 6.57E+08 | 9.61E+09 | 7.77E+08  | 4.16E+09 | 7.17E+08 | 6.78E+07 | 1.42E+07    | 12   |
| L288                   | Putative B-type lectin protein (1TMD)              | 7.2E+08 | 5.6E+07   | 7.21E+08 | 2.16E+08 | 6.41E+08 | 9.71E+07  | 1.39E+10 | 2.08E+09 | 1.10E+11 | 1.57E+10    | 7    |
| R699                   | Procollagen-lysine 5-dioxygenase                   | 0       | 0         | 0        | 0        | 5.58E+08 | 2.05E+08  | 1.34E+09 | 1.12E+08 | 2.54E+07 | 1.27E+07    | 3    |
| <b>Uncharacterized</b> |                                                    |         |           |          |          |          |           |          |          |          |             |      |
| L442                   | Uncharacterized protein                            | 3E+09   | 2.8E+08   | 4.54E+09 | 7.08E+07 | 8.14E+09 | 2.74E+08  | 1.98E+11 | 1.37E+10 | 1.40E+12 | 1.18E+11    | 98   |
| R692                   | Uncharacterized protein                            | 6E+08   | 3.2E+08   | 2.36E+08 | 9.93E+07 | 1.69E+09 | 9.37E+08  | 1.17E+11 | 1.20E+10 | 7.73E+11 | 1.11E+11    | 56   |
| R472                   | Uncharacterized protein (1 TMD)                    | 5.9E+09 | 2.6E+09   | 1.29E+10 | 1.17E+09 | 1.24E+10 | 2.83E+09  | 1.15E+10 | 9.91E+08 | 5.68E+10 | 8.71E+09    | 50   |
| L488                   | Uncharacterized protein                            | 7.4E+09 | 2.3E+09   | 1.04E+10 | 7.23E+08 | 1.61E+10 | 1.00E+09  | 4.50E+10 | 1.22E+10 | 4.64E+11 | 4.44E+10    | 48   |
| L454                   | Uncharacterized protein                            | 3.6E+09 | 1.2E+09   | 1.66E+09 | 2.71E+08 | 2.19E+09 | 2.56E+08  | 5.00E+09 | 1.48E+08 | 1.63E+10 | 2.93E+08    | 48   |
| R553                   | Uncharacterized protein                            | 1.4E+09 | 5.9E+08   | 1.49E+09 | 3.43E+08 | 2.74E+09 | 2.16E+09  | 1.57E+10 | 3.26E+09 | 3.19E+11 | 3.39E+10    | 33   |
| R403                   | Uncharacterized protein                            | 3.5E+08 | 1E+08     | 6.71E+08 | 1.88E+08 | 1.25E+09 | 5.01E+08  | 3.55E+09 | 5.26E+08 | 3.56E+10 | 4.16E+09    | 32   |
| R327                   | Uncharacterized protein                            | 1.9E+08 | 1.4E+08   | 5.17E+08 | 1.92E+08 | 6.59E+08 | 6.76E+07  | 2.88E+09 | 3.11E+08 | 2.71E+10 | 4.76E+09    | 32   |
| R338                   | Uncharacterized protein                            | 1.1E+09 | 3.6E+08   | 1.41E+10 | 1.23E+09 | 5.01E+10 | 7.20E+09  | 4.49E+10 | 2.19E+09 | 9.94E+08 | 2.85E+08    | 32   |
| L515                   | Uncharacterized protein                            | 2.8E+08 | 1.3E+08   | 1.57E+09 | 1.79E+08 | 1.30E+09 | 4.26E+08  | 5.12E+09 | 6.02E+08 | 4.48E+10 | 1.47E+10    | 28   |
| L567                   | Uncharacterized protein                            | 2.1E+09 | 8.3E+08   | 8.19E+08 | 1.59E+07 | 8.37E+09 | 6.92E+09  | 5.65E+10 | 9.95E+09 | 3.83E+11 | 6.06E+10    | 26   |
| R253                   | Uncharacterized protein                            | 1.4E+09 | 7.3E+07   | 2.27E+09 | 2.44E+08 | 2.58E+09 | 6.61E+08  | 1.81E+10 | 3.82E+09 | 1.31E+11 | 1.11E+10    | 22   |

| Gene | Function                         | Mock    | Mock (SE) | 4h       | 4h (SE)  | 5.5h     | 5.5h (SE) | 7h       | 7h (SE)  | Virion   | Virion (SE) | #Pep |
|------|----------------------------------|---------|-----------|----------|----------|----------|-----------|----------|----------|----------|-------------|------|
| L399 | Uncharacterized protein          | 6.2E+08 | 1E+08     | 2.24E+09 | 9.24E+07 | 2.35E+09 | 6.23E+08  | 2.80E+10 | 5.31E+09 | 3.54E+11 | 3.28E+10    | 21   |
| L452 | Uncharacterized protein          | 6E+08   | 1.1E+08   | 3.40E+08 | 9.82E+07 | 1.01E+09 | 1.83E+08  | 2.39E+09 | 8.56E+08 | 1.82E+11 | 2.20E+10    | 21   |
| R658 | Uncharacterized protein          | 6.3E+07 | 1.5E+07   | 4.92E+06 | 4.92E+06 | 2.95E+07 | 2.81E+07  | 2.96E+09 | 8.62E+07 | 2.50E+10 | 1.21E+09    | 21   |
| R402 | Uncharacterized protein          | 3.4E+07 | 9197565   | 1.23E+08 | 2.99E+07 | 3.96E+08 | 1.07E+08  | 6.43E+09 | 9.66E+08 | 6.48E+10 | 7.69E+09    | 20   |
| L719 | Uncharacterized protein          | 3.8E+07 | 1.8E+07   | 1.30E+08 | 1.54E+07 | 5.88E+08 | 2.19E+08  | 1.13E+10 | 2.40E+09 | 1.20E+11 | 1.43E+10    | 19   |
| R347 | Uncharacterized protein          | 8.3E+08 | 4.3E+08   | 1.06E+09 | 1.82E+08 | 2.97E+09 | 1.17E+09  | 6.61E+10 | 8.33E+09 | 1.84E+11 | 2.40E+10    | 19   |
| L417 | Uncharacterized protein          | 1.3E+09 | 5.4E+08   | 6.39E+08 | 8.70E+07 | 8.66E+08 | 9.66E+07  | 3.36E+09 | 6.93E+08 | 2.38E+10 | 2.67E+09    | 19   |
| R252 | Uncharacterized protein          | 5.5E+10 | 2.6E+10   | 2.97E+10 | 3.49E+09 | 2.63E+12 | 1.20E+11  | 6.25E+12 | 3.67E+11 | 1.37E+11 | 1.19E+10    | 19   |
| R459 | Uncharacterized protein          | 3.5E+08 | 7.2E+07   | 1.19E+09 | 1.22E+08 | 2.65E+09 | 1.32E+09  | 5.17E+10 | 5.72E+09 | 3.36E+11 | 6.11E+10    | 17   |
| R387 | Uncharacterized protein (1 TMD ) | 2.6E+09 | 2.3E+08   | 3.26E+09 | 1.82E+08 | 3.47E+09 | 6.27E+08  | 9.19E+10 | 2.06E+10 | 5.51E+11 | 1.22E+11    | 17   |
| L533 | Uncharacterized protein          | 3E+09   | 6.5E+08   | 1.79E+09 | 1.45E+08 | 2.00E+09 | 2.85E+08  | 4.58E+09 | 4.39E+08 | 2.10E+10 | 1.83E+09    | 16   |
| R561 | Uncharacterized protein          | 2.9E+10 | 1.9E+10   | 7.05E+10 | 4.79E+09 | 6.19E+11 | 9.06E+09  | 1.05E+12 | 1.27E+11 | 6.59E+09 | 4.41E+09    | 16   |
| L552 | Uncharacterized protein          | 6.2E+08 | 3.6E+08   | 3.96E+08 | 1.93E+08 | 2.48E+08 | 9.18E+07  | 1.07E+09 | 1.18E+08 | 1.30E+10 | 1.63E+09    | 15   |
| R489 | Uncharacterized protein          | 1.1E+09 | 5.5E+08   | 1.01E+09 | 1.40E+08 | 2.51E+09 | 3.78E+08  | 4.77E+10 | 8.90E+09 | 1.62E+11 | 1.64E+10    | 15   |
| R463 | Uncharacterized protein          | 5.1E+09 | 4.6E+09   | 4.21E+08 | 1.35E+08 | 4.06E+08 | 3.47E+07  | 4.87E+09 | 1.21E+09 | 2.19E+10 | 2.63E+09    | 15   |
| R505 | Uncharacterized protein          | 1.6E+09 | 3.6E+08   | 6.37E+09 | 3.15E+08 | 9.84E+10 | 1.06E+10  | 1.47E+10 | 9.52E+08 | 6.65E+08 | 2.02E+08    | 15   |
| R562 | Uncharacterized protein          | 1.3E+08 | 3.4E+07   | 8.99E+09 | 3.87E+08 | 3.00E+10 | 3.35E+09  | 2.71E+10 | 4.30E+09 | 1.58E+08 | 4.76E+07    | 15   |
| R705 | Uncharacterized protein          | 3E+09   | 1.2E+08   | 7.19E+09 | 4.25E+08 | 9.53E+09 | 8.91E+08  | 3.64E+11 | 4.66E+10 | 2.23E+12 | 1.10E+11    | 14   |
| R610 | Uncharacterized protein          | 3.3E+10 | 1.4E+10   | 5.42E+09 | 3.79E+09 | 3.51E+10 | 3.16E+10  | 6.36E+10 | 2.48E+10 | 8.18E+10 | 1.96E+10    | 13   |
| R607 | Uncharacterized protein          | 3.3E+08 | 9.9E+07   | 2.13E+10 | 1.61E+09 | 9.09E+10 | 1.18E+10  | 9.32E+10 | 8.19E+09 | 4.40E+08 | 1.11E+08    | 13   |
| L397 | Uncharacterized protein          | 4.1E+08 | 1.3E+08   | 8.43E+09 | 2.59E+08 | 3.89E+10 | 1.37E+10  | 2.45E+10 | 3.65E+09 | 3.25E+08 | 4.10E+07    | 13   |
| L516 | Uncharacterized protein          | 1.3E+09 | 1.4E+08   | 3.47E+09 | 3.61E+08 | 4.39E+09 | 7.66E+08  | 7.03E+09 | 2.87E+08 | 3.97E+10 | 5.06E+09    | 12   |
| L645 | Uncharacterized protein          | 1.6E+08 | 6.1E+07   | 3.12E+08 | 1.15E+08 | 3.34E+08 | 4.28E+07  | 2.39E+10 | 2.21E+09 | 1.44E+11 | 1.40E+10    | 12   |
| L485 | Uncharacterized protein          | 9E+07   | 4.5E+07   | 2.89E+08 | 1.79E+07 | 6.05E+08 | 6.55E+07  | 2.40E+10 | 7.40E+08 | 8.52E+10 | 1.36E+10    | 12   |
| R653 | Uncharacterized protein          | 7.8E+07 | 4.2E+07   | 3.08E+08 | 9.42E+07 | 4.02E+08 | 3.78E+07  | 1.37E+10 | 9.61E+08 | 5.88E+10 | 5.66E+09    | 11   |
| L65  | Uncharacterized protein (1 TMD ) | 4.6E+07 | 1.8E+07   | 8.21E+08 | 2.66E+08 | 2.85E+08 | 7.47E+07  | 2.73E+09 | 2.26E+08 | 4.17E+10 | 8.77E+09    | 11   |
| R871 | Uncharacterized protein          | 5222151 | 1409040   | 2.71E+10 | 4.38E+09 | 8.36E+09 | 1.29E+09  | 3.49E+08 | 5.21E+07 | 2.09E+08 | 9.57E+07    | 11   |
| L611 | Uncharacterized protein          | 6.5E+07 | 3.8E+07   | 5.73E+09 | 4.72E+08 | 8.77E+09 | 2.17E+09  | 6.62E+09 | 1.19E+09 | 8.00E+08 | 3.07E+07    | 11   |
| L550 | Uncharacterized protein          | 3.1E+07 | 1.5E+07   | 1.03E+08 | 4.44E+07 | 1.48E+08 | 4.01E+07  | 1.74E+10 | 6.20E+09 | 3.27E+11 | 4.45E+10    | 10   |
| L612 | Uncharacterized protein          | 3.1E+09 | 1E+09     | 1.76E+09 | 2.61E+08 | 2.17E+09 | 2.65E+08  | 1.37E+10 | 9.69E+08 | 1.60E+11 | 2.89E+10    | 10   |
| L389 | Uncharacterized protein          | 5.9E+07 | 4E+07     | 1.72E+09 | 2.97E+08 | 7.29E+08 | 2.45E+08  | 1.94E+09 | 3.55E+08 | 1.13E+10 | 9.12E+08    | 10   |
| L324 | Uncharacterized protein          | 1.5E+08 | 1.3E+08   | 5.63E+08 | 1.62E+08 | 7.71E+08 | 1.30E+08  | 7.71E+09 | 2.23E+09 | 6.87E+10 | 1.39E+10    | 10   |
| L724 | Uncharacterized protein          | 3.2E+07 | 1.6E+07   | 6.27E+07 | 1.86E+07 | 1.10E+08 | 5.19E+06  | 1.71E+10 | 2.26E+09 | 1.15E+11 | 6.55E+09    | 10   |
| R474 | Uncharacterized protein (1TMD )  | 2.3E+08 | 7.7E+07   | 4.32E+08 | 2.61E+08 | 3.88E+10 | 1.29E+10  | 5.69E+10 | 7.53E+09 | 8.21E+08 | 4.05E+08    | 10   |
| R369 | Uncharacterized protein          | 5.4E+09 | 1.9E+09   | 2.94E+10 | 3.30E+08 | 5.57E+10 | 6.03E+09  | 6.69E+10 | 2.28E+08 | 3.07E+09 | 2.33E+09    | 10   |
| R161 | Uncharacterized protein          | 4.1E+08 | 2.5E+08   | 9.12E+07 | 1.16E+07 | 1.79E+08 | 4.17E+07  | 3.61E+09 | 5.23E+07 | 1.93E+10 | 2.44E+09    | 9    |
| R457 | Uncharacterized protein          | 1.2E+08 | 6E+07     | 3.82E+08 | 1.93E+07 | 4.17E+08 | 7.62E+07  | 1.47E+10 | 2.22E+09 | 5.61E+10 | 1.02E+10    | 9    |
| L872 | Uncharacterized protein          | 4E+08   | 2E+08     | 1.41E+09 | 4.72E+07 | 1.20E+09 | 1.39E+08  | 1.03E+09 | 6.10E+07 | 1.71E+10 | 1.16E+09    | 9    |
| L201 | Uncharacterized protein          | 4E+09   | 1.6E+09   | 9.20E+09 | 2.54E+08 | 9.20E+10 | 7.28E+09  | 1.12E+11 | 2.55E+10 | 2.92E+08 | 1.00E+08    | 9    |

| Gene | Function                        | Mock    | Mock (SE) | 4h       | 4h (SE)  | 5.5h     | 5.5h (SE) | 7h       | 7h (SE)  | Virion   | Virion (SE) | #Pep |
|------|---------------------------------|---------|-----------|----------|----------|----------|-----------|----------|----------|----------|-------------|------|
| L712 | Uncharacterized protein         | 1.7E+09 | 8.2E+08   | 1.07E+10 | 9.69E+08 | 1.66E+10 | 3.83E+09  | 1.13E+10 | 1.11E+09 | 2.72E+08 | 4.77E+07    | 9    |
| R557 | Uncharacterized protein (1 TMD) | 2.3E+09 | 3.6E+08   | 6.81E+09 | 6.98E+08 | 6.88E+09 | 5.15E+08  | 8.97E+10 | 1.59E+10 | 3.22E+11 | 4.71E+09    | 8    |
| L591 | Uncharacterized protein         | 3.4E+07 | 2E+07     | 1.20E+08 | 2.23E+07 | 2.17E+08 | 3.67E+07  | 2.00E+10 | 2.30E+09 | 8.60E+10 | 1.89E+10    | 8    |
| L647 | Uncharacterized protein         | 1.1E+10 | 3.6E+09   | 2.14E+09 | 6.24E+08 | 1.85E+10 | 1.57E+10  | 2.83E+10 | 1.54E+10 | 3.64E+11 | 2.01E+10    | 8    |
| R390 | Uncharacterized protein (1 TMD) | 2.5E+08 | 1.1E+08   | 2.31E+09 | 4.51E+08 | 1.44E+09 | 1.55E+08  | 1.65E+09 | 2.82E+08 | 8.30E+09 | 1.47E+09    | 8    |
| L114 | Uncharacterized protein         | 4.9E+09 | 2.4E+09   | 6.06E+10 | 2.32E+09 | 1.22E+11 | 3.54E+10  | 5.67E+10 | 4.54E+09 | 6.29E+08 | 5.20E+07    | 8    |
| R349 | Uncharacterized protein         | 4.5E+07 | 2.3E+07   | 4.83E+08 | 1.06E+08 | 3.69E+09 | 9.36E+08  | 2.42E+09 | 2.61E+08 | 3.57E+07 | 2.07E+07    | 8    |
| R588 | Uncharacterized protein         | 1.2E+07 | 1.2E+07   | 3.31E+08 | 1.02E+08 | 2.85E+09 | 4.31E+08  | 6.70E+09 | 7.46E+08 | 1.99E+09 | 2.97E+08    | 8    |
| L586 | Uncharacterized protein         | 2.9E+08 | 1E+08     | 2.30E+08 | 1.19E+08 | 3.19E+08 | 1.50E+08  | 5.08E+09 | 3.63E+08 | 3.53E+10 | 5.77E+09    | 7    |
| R305 | Uncharacterized protein (1 TMD) | 1.5E+08 | 8.7E+07   | 5.01E+08 | 1.70E+08 | 6.84E+08 | 1.28E+08  | 4.39E+09 | 1.01E+09 | 6.99E+10 | 7.84E+09    | 7    |
| R326 | Uncharacterized protein         | 1.7E+08 | 5.3E+07   | 4.10E+08 | 3.26E+07 | 3.31E+08 | 6.40E+07  | 1.16E+09 | 1.42E+08 | 8.39E+09 | 1.50E+09    | 7    |
| L330 | Uncharacterized protein (1 TMD) | 5.8E+08 | 2.7E+08   | 7.24E+08 | 9.65E+07 | 1.37E+09 | 6.36E+08  | 1.55E+10 | 1.73E+09 | 1.26E+11 | 2.13E+10    | 7    |
| L357 | Uncharacterized protein         | 1.8E+08 | 6.3E+07   | 2.95E+08 | 2.30E+07 | 2.36E+08 | 1.50E+07  | 1.08E+09 | 1.18E+08 | 6.02E+09 | 1.04E+09    | 7    |
| R727 | Uncharacterized protein         | 1.2E+08 | 1E+08     | 8.82E+07 | 2.24E+07 | 2.65E+08 | 1.53E+08  | 3.19E+09 | 7.32E+08 | 4.97E+10 | 8.82E+09    | 7    |
| R648 | Uncharacterized protein         | 8.5E+08 | 1.4E+08   | 3.39E+08 | 4.33E+07 | 5.40E+08 | 1.08E+08  | 5.69E+09 | 3.18E+09 | 1.21E+10 | 5.51E+09    | 7    |
| L451 | Uncharacterized protein         | 1.4E+09 | 2.1E+08   | 6.41E+08 | 1.95E+08 | 6.88E+09 | 8.53E+08  | 1.67E+10 | 2.61E+09 | 8.38E+07 | 4.14E+07    | 7    |
| R530 | Uncharacterized protein         | 1.6E+08 | 8E+07     | 4.69E+08 | 3.51E+07 | 2.03E+09 | 2.70E+08  | 1.60E+09 | 9.22E+07 | 1.68E+08 | 7.73E+07    | 7    |
| R160 | Uncharacterized protein         | 1.2E+08 | 3E+07     | 3.53E+08 | 9.68E+07 | 1.94E+08 | 1.22E+08  | 3.87E+09 | 5.19E+08 | 2.27E+10 | 3.04E+08    | 6    |
| R706 | Uncharacterized protein         | 7E+07   | 3837938   | 1.25E+08 | 3.70E+07 | 6.83E+08 | 1.64E+08  | 9.88E+08 | 1.76E+08 | 7.04E+09 | 1.61E+09    | 6    |
| L701 | Uncharacterized protein (1 TMD) | 2.8E+09 | 3.4E+08   | 1.32E+09 | 5.99E+08 | 1.97E+09 | 7.08E+08  | 1.40E+10 | 2.64E+09 | 8.94E+10 | 1.32E+10    | 6    |
| L492 | Uncharacterized protein         | 3.1E+09 | 1E+09     | 1.26E+09 | 2.76E+08 | 3.96E+09 | 1.75E+09  | 1.61E+10 | 2.48E+09 | 9.05E+10 | 9.11E+09    | 6    |
| R646 | Uncharacterized protein         | 6.9E+09 | 2.3E+09   | 4.12E+09 | 6.66E+07 | 3.63E+09 | 8.43E+08  | 8.99E+09 | 1.24E+09 | 7.49E+10 | 1.03E+10    | 6    |
| R473 | Uncharacterized protein         | 5E+08   | 1.5E+08   | 2.69E+09 | 1.14E+08 | 1.78E+09 | 2.10E+08  | 1.06E+09 | 1.07E+08 | 4.62E+09 | 9.31E+08    | 6    |
| R217 | Uncharacterized protein         | 1.7E+08 | 1.1E+08   | 6.27E+07 | 3.21E+07 | 1.99E+08 | 6.35E+07  | 4.71E+08 | 4.34E+07 | 3.00E+09 | 3.83E+08    | 6    |
| L778 | Uncharacterized protein (1 TMD) | 8.5E+08 | 4E+08     | 5.37E+08 | 1.60E+08 | 5.99E+08 | 1.71E+08  | 4.27E+09 | 5.16E+08 | 2.22E+10 | 8.28E+08    | 6    |
| L629 | Uncharacterized protein         | 5.5E+08 | 3.9E+08   | 1.26E+08 | 4.22E+07 | 4.98E+08 | 4.10E+08  | 1.29E+09 | 6.14E+08 | 5.79E+09 | 5.38E+08    | 6    |
| L116 | Uncharacterized protein         | 2E+07   | 1E+07     | 9.97E+09 | 2.36E+09 | 4.63E+09 | 9.51E+08  | 9.72E+07 | 1.77E+07 | 1.04E+08 | 5.67E+07    | 6    |
| R370 | Uncharacterized protein         | 5.2E+08 | 2.1E+08   | 4.23E+09 | 3.56E+08 | 3.16E+10 | 4.96E+09  | 6.43E+10 | 1.45E+10 | 1.44E+09 | 6.27E+08    | 6    |
| R819 | Uncharacterized protein         | 1.2E+08 | 3E+07     | 1.67E+09 | 1.85E+08 | 2.33E+09 | 6.56E+08  | 1.56E+09 | 2.84E+08 | 1.20E+08 | 6.60E+07    | 6    |
| R710 | Uncharacterized protein (1 TMD) | 2.9E+08 | 4.9E+07   | 6.89E+08 | 1.99E+08 | 6.05E+08 | 6.39E+07  | 4.34E+10 | 6.14E+09 | 2.97E+11 | 4.51E+10    | 5    |
| L448 | Uncharacterized protein (1 TMD) | 2.1E+07 | 2255150   | 6.42E+07 | 2.65E+07 | 3.44E+07 | 2.66E+07  | 1.39E+09 | 2.48E+08 | 4.42E+09 | 7.96E+08    | 5    |
| R623 | Uncharacterized protein         | 1.8E+08 | 8.5E+07   | 2.13E+07 | 3.80E+06 | 1.03E+09 | 3.74E+08  | 2.04E+10 | 3.34E+09 | 2.11E+11 | 1.07E+10    | 5    |
| L504 | Uncharacterized protein         | 5.4E+08 | 1.6E+08   | 1.41E+09 | 1.31E+08 | 3.87E+09 | 4.76E+08  | 3.07E+09 | 6.55E+08 | 2.78E+07 | 2.16E+07    | 5    |
| R506 | Uncharacterized protein         | 2.1E+07 | 1.4E+07   | 6.77E+06 | 2.37E+06 | 3.63E+08 | 1.03E+08  | 7.97E+09 | 5.51E+08 | 4.87E+08 | 9.82E+07    | 5    |
| R865 | Uncharacterized protein         | 3.5E+07 | 2.2E+07   | 4.13E+07 | 2.66E+07 | 1.77E+09 | 6.72E+08  | 3.84E+08 | 3.93E+07 | 3.40E+06 | 1.65E+06    | 5    |
| L479 | Uncharacterized protein         | 3.4E+07 | 1.7E+07   | 1.23E+09 | 1.15E+08 | 3.18E+09 | 7.48E+08  | 3.16E+09 | 1.40E+08 | 7.66E+06 | 4.36E+06    | 5    |
| L12  | Uncharacterized protein         | 5.1E+07 | 2.4E+07   | 4.96E+08 | 1.51E+08 | 4.53E+09 | 7.23E+08  | 6.65E+09 | 4.52E+08 | 3.12E+07 | 6.57E+06    | 5    |



| Gene | Function                        | Mock    | Mock (SE) | 4h       | 4h (SE)  | 5.5h     | 5.5h (SE) | 7h       | 7h (SE)  | Virion   | Virion (SE) | #Pep |
|------|---------------------------------|---------|-----------|----------|----------|----------|-----------|----------|----------|----------|-------------|------|
| L5   | Uncharacterized protein         | 1.5E+07 | 1.5E+07   | 7.94E+07 | 2.30E+07 | 8.03E+09 | 1.07E+09  | 8.76E+09 | 4.93E+08 | 4.92E+07 | 2.02E+07    | 5    |
| L862 | Uncharacterized protein         | 4966296 | 4966296   | 2.38E+09 | 2.50E+08 | 3.46E+09 | 1.12E+09  | 1.09E+09 | 4.96E+07 | 6.14E+08 | 2.58E+08    | 5    |
| R816 | Uncharacterized protein         | 1.2E+09 | 2.8E+08   | 2.64E+09 | 4.59E+08 | 2.25E+09 | 3.73E+08  | 3.01E+10 | 2.95E+09 | 4.85E+10 | 1.59E+10    | 4    |
| L690 | Uncharacterized protein         | 5.8E+07 | 7398212   | 6.67E+07 | 2.27E+07 | 1.79E+08 | 6.33E+07  | 3.50E+09 | 1.59E+09 | 9.08E+09 | 4.87E+09    | 4    |
| R714 | Uncharacterized protein         | 8.7E+07 | 3.9E+07   | 1.19E+08 | 3.96E+07 | 1.57E+08 | 7.07E+07  | 5.22E+08 | 5.86E+07 | 8.92E+09 | 1.46E+09    | 4    |
| R188 | putative amine oxidase          | 2.7E+07 | 1.9E+07   | 2.27E+07 | 4.57E+06 | 4.38E+07 | 1.57E+07  | 3.09E+07 | 1.99E+06 | 6.95E+08 | 4.90E+07    | 4    |
| R821 | Uncharacterized protein         | 4.5E+08 | 1.1E+08   | 5.95E+08 | 7.96E+07 | 8.30E+09 | 7.16E+08  | 5.01E+09 | 3.71E+08 | 5.75E+06 | 5.29E+06    | 4    |
| L491 | Uncharacterized protein         | 9613869 | 4395309   | 6.48E+07 | 2.69E+07 | 6.12E+08 | 2.55E+08  | 9.07E+09 | 1.40E+09 | 1.14E+08 | 3.32E+07    | 4    |
| L684 | Uncharacterized protein         | 1.4E+08 | 9.2E+07   | 4.54E+07 | 1.91E+07 | 3.02E+08 | 3.40E+07  | 4.59E+08 | 1.02E+08 | 3.54E+09 | 8.48E+08    | 4    |
| L184 | Uncharacterized protein         | 1.8E+07 | 1.4E+07   | 1.38E+08 | 6.80E+07 | 6.88E+08 | 9.53E+07  | 1.16E+09 | 1.39E+08 | 1.53E+08 | 5.37E+07    | 4    |
| R902 | Uncharacterized protein         | 4.4E+07 | 3.1E+07   | 1.27E+08 | 9.86E+07 | 1.07E+09 | 4.28E+08  | 2.80E+09 | 4.98E+08 | 9.59E+06 | 7.08E+06    | 4    |
| L157 | Uncharacterized protein         | 1.6E+08 | 2.1E+07   | 3.11E+09 | 8.64E+07 | 3.55E+09 | 5.87E+08  | 1.42E+09 | 2.42E+08 | 5.56E+07 | 4.25E+07    | 4    |
| R379 | Uncharacterized protein         | 1E+08   | 4863744   | 5.36E+08 | 1.49E+08 | 4.46E+09 | 1.94E+08  | 4.55E+09 | 4.47E+08 | 5.07E+07 | 2.26E+07    | 4    |
| L792 | Uncharacterized protein         | 2.1E+08 | 5.2E+07   | 1.54E+09 | 8.35E+07 | 4.66E+09 | 1.11E+09  | 4.65E+09 | 8.45E+07 | 8.86E+07 | 3.67E+07    | 4    |
| R450 | Uncharacterized protein         | 1E+08   | 5.1E+07   | 6.71E+08 | 2.47E+07 | 1.13E+10 | 9.39E+08  | 9.70E+09 | 7.78E+08 | 1.46E+08 | 2.34E+07    | 4    |
| L183 | Uncharacterized protein         | 5.2E+07 | 4E+07     | 1.22E+08 | 5.54E+07 | 5.22E+08 | 5.02E+07  | 1.70E+09 | 1.75E+08 | 1.04E+08 | 5.02E+07    | 4    |
| L152 | Uncharacterized protein         | 7810080 | 7092706   | 2.89E+08 | 5.80E+07 | 6.55E+08 | 2.83E+08  | 4.68E+08 | 2.42E+07 | 1.15E+06 | 5.82E+05    | 4    |
| R336 | Uncharacterized protein         | 6.8E+08 | 6.6E+08   | 3.86E+09 | 5.92E+08 | 1.96E+10 | 2.83E+09  | 1.81E+10 | 2.32E+09 | 2.02E+07 | 1.28E+07    | 4    |
| R346 | Uncharacterized protein         | 3495913 | 3495913   | 7.44E+06 | 5.61E+06 | 6.41E+08 | 2.35E+08  | 5.75E+09 | 8.57E+08 | 9.10E+10 | 1.93E+10    | 4    |
| R691 | Uncharacterized protein         | 0       | 0         | 4.72E+08 | 2.17E+08 | 4.96E+08 | 1.50E+08  | 1.43E+09 | 8.46E+07 | 1.00E+10 | 2.06E+09    | 4    |
| R424 | Uncharacterized protein         | 421553  | 421553    | 2.17E+07 | 6.73E+06 | 8.76E+08 | 9.71E+07  | 1.82E+09 | 1.56E+08 | 3.79E+07 | 1.67E+07    | 4    |
| R527 | Uncharacterized protein         | 1.8E+08 | 2.5E+07   | 1.57E+09 | 1.40E+08 | 1.03E+10 | 2.58E+08  | 1.04E+10 | 1.14E+09 | 1.21E+10 | 2.88E+08    | 4    |
| L309 | Uncharacterized protein (1 TMD) | 2E+07   | 5760301   | 2.64E+08 | 4.99E+07 | 1.01E+08 | 2.76E+07  | 1.74E+09 | 3.77E+08 | 9.91E+09 | 4.65E+08    | 3    |
| L539 | Uncharacterized protein         | 9267568 | 3665440   | 9.87E+06 | 4.98E+06 | 1.17E+08 | 4.95E+07  | 1.46E+08 | 7.22E+06 | 1.68E+09 | 5.78E+08    | 3    |
| R372 | Uncharacterized protein (1 TMD) | 27258.3 | 13991.3   | 8.11E+06 | 4.80E+06 | 8.20E+06 | 4.98E+06  | 9.79E+06 | 4.18E+06 | 4.82E+08 | 2.31E+08    | 3    |
| L352 | Uncharacterized protein         | 6.7E+07 | 3.6E+07   | 7.03E+07 | 4.23E+07 | 1.35E+08 | 1.09E+08  | 1.04E+09 | 1.33E+08 | 2.44E+09 | 7.18E+07    | 3    |
| R468 | Uncharacterized protein (3 TMD) | 1.7E+08 | 9.5E+07   | 2.02E+07 | 6.96E+06 | 2.36E+07 | 1.19E+07  | 2.03E+09 | 4.57E+08 | 2.05E+09 | 3.30E+08    | 3    |
| R353 | Uncharacterized protein         | 3.7E+09 | 1.5E+09   | 4.76E+10 | 1.05E+10 | 1.45E+10 | 2.58E+09  | 5.81E+09 | 2.41E+08 | 3.38E+08 | 2.22E+08    | 3    |
| R423 | Uncharacterized protein         | 5.9E+07 | 4.8E+07   | 8.48E+07 | 2.68E+07 | 6.94E+08 | 6.84E+07  | 7.98E+08 | 1.03E+08 | 3.07E+07 | 1.86E+07    | 3    |
| R535 | Uncharacterized protein         | 5.1E+07 | 3.6E+07   | 3.68E+05 | 3.68E+05 | 4.94E+08 | 2.39E+07  | 9.04E+08 | 1.47E+08 | 2.16E+08 | 1.06E+08    | 3    |
| L16  | Uncharacterized protein         | 0       | 0         | 1.11E+07 | 1.11E+07 | 4.45E+07 | 2.55E+07  | 1.44E+08 | 3.65E+07 | 2.44E+09 | 3.83E+08    | 3    |
| R210 | Uncharacterized protein         | 1.7E+07 | 1.7E+07   | 8.40E+07 | 6.07E+07 | 8.26E+07 | 5.22E+07  | 2.32E+08 | 3.29E+07 | 1.79E+09 | 4.12E+08    | 3    |
| R503 | Uncharacterized protein         | 0       | 0         | 7.51E+07 | 8.31E+06 | 7.44E+08 | 3.09E+08  | 1.59E+08 | 4.38E+07 | 9.83E+06 | 3.84E+06    | 3    |
| R220 | Uncharacterized protein         | 0       | 0         | 1.78E+08 | 5.69E+07 | 5.85E+08 | 2.12E+08  | 2.90E+08 | 9.22E+07 | 2.87E+06 | 2.87E+06    | 3    |
| L490 | Uncharacterized protein         | 0       | 0         | 3.26E+07 | 7.32E+06 | 6.57E+08 | 2.57E+08  | 5.11E+08 | 7.21E+07 | 8.03E+05 | 7.25E+05    | 3    |
| L728 | Uncharacterized protein         | 3757895 | 3757895   | 1.01E+07 | 1.01E+07 | 1.79E+09 | 7.16E+08  | 2.50E+09 | 5.64E+08 | 2.68E+07 | 1.34E+07    | 3    |
| R866 | Uncharacterized protein         | 0       | 0         | 1.85E+07 | 1.11E+07 | 5.51E+07 | 1.13E+07  | 8.83E+07 | 4.38E+07 | 1.62E+07 | 1.58E+07    | 3    |
| L585 | Uncharacterized protein         | 5E+07   | 7200233   | 5.57E+07 | 8.84E+06 | 2.19E+08 | 6.53E+07  | 1.02E+09 | 1.03E+08 | 1.63E+10 | 3.27E+09    | 2    |
| R546 | Uncharacterized protein         | 9764442 | 4896946   | 8.90E+07 | 1.98E+07 | 9.68E+07 | 6.14E+07  | 3.75E+09 | 6.31E+08 | 3.17E+10 | 4.78E+09    | 2    |

| Gene | Function                         | Mock    | Mock (SE) | 4h       | 4h (SE)  | 5.5h     | 5.5h (SE) | 7h       | 7h (SE)  | Virion   | Virion (SE) | #Pep |
|------|----------------------------------|---------|-----------|----------|----------|----------|-----------|----------|----------|----------|-------------|------|
| L236 | Uncharacterized protein          | 3.2E+07 | 9897642   | 7.86E+07 | 3.24E+07 | 5.05E+07 | 2.88E+07  | 1.44E+09 | 4.49E+08 | 3.12E+09 | 2.58E+08    | 2    |
| R513 | Uncharacterized protein (4 TMD ) | 3E+08   | 1.3E+08   | 8.71E+08 | 2.08E+08 | 2.73E+08 | 1.66E+07  | 1.56E+10 | 1.92E+09 | 1.17E+11 | 1.52E+10    | 2    |
| L242 | Uncharacterized protein          | 64611   | 50372.6   | 1.02E+09 | 1.76E+08 | 1.47E+09 | 2.33E+08  | 8.15E+08 | 1.40E+07 | 6.66E+07 | 3.34E+07    | 2    |
| R735 | Uncharacterized protein          | 2.3E+07 | 7790895   | 3.59E+08 | 4.21E+07 | 7.22E+08 | 2.67E+08  | 1.69E+08 | 3.41E+07 | 7.88E+07 | 1.96E+07    | 2    |
| R297 | Uncharacterized protein          | 1.5E+07 | 7843208   | 1.31E+06 | 1.31E+06 | 8.46E+08 | 1.84E+08  | 5.65E+08 | 9.34E+07 | 4.19E+07 | 5.25E+06    | 2    |
| R556 | Uncharacterized protein          | 217865  | 151019    | 1.39E+07 | 1.39E+07 | 5.43E+08 | 2.77E+08  | 1.09E+09 | 2.28E+08 | 3.01E+07 | 2.47E+07    | 2    |
| L666 | Uncharacterized protein          | 6.1E+07 | 1.2E+07   | 1.13E+07 | 1.08E+07 | 4.66E+08 | 9.67E+07  | 1.41E+09 | 3.29E+07 | 1.36E+07 | 1.22E+07    | 2    |
| L487 | Uncharacterized protein (1 TMD ) | 5.9E+07 | 2E+07     | 5.24E+07 | 9.73E+06 | 3.69E+08 | 1.80E+07  | 5.05E+09 | 1.58E+09 | 1.05E+08 | 4.27E+07    | 2    |
| L537 | Uncharacterized protein          | 3.2E+07 | 1.1E+07   | 4.37E+07 | 9.56E+06 | 8.58E+08 | 1.51E+08  | 7.44E+08 | 6.66E+07 | 1.01E+08 | 9.13E+07    | 2    |
| L262 | Uncharacterized protein          | 2.8E+07 | 1.7E+07   | 8.54E+07 | 1.71E+07 | 1.87E+09 | 3.12E+08  | 2.97E+09 | 2.30E+08 | 4.49E+07 | 1.54E+07    | 2    |
| L333 | Uncharacterized protein          | 3.3E+08 | 1.6E+08   | 1.83E+09 | 2.97E+07 | 1.60E+09 | 3.44E+08  | 2.83E+08 | 4.65E+07 | 0        | 0           | 2    |
| R409 | Uncharacterized protein          | 0       | 0         | 1.73E+07 | 8.82E+06 | 3.90E+07 | 1.13E+07  | 1.55E+09 | 2.95E+08 | 4.45E+09 | 6.24E+08    | 2    |
| R746 | Uncharacterized protein          | 0       | 0         | 8.84E+08 | 1.94E+07 | 1.25E+09 | 2.16E+08  | 5.75E+08 | 1.23E+08 | 7.61E+07 | 2.02E+07    | 2    |
| R495 | Uncharacterized protein (2 TMD ) | 0       | 0         | 0        | 0        | 1.39E+07 | 1.31E+07  | 3.74E+08 | 7.29E+07 | 2.30E+09 | 3.89E+08    | 2    |
| L53  | Uncharacterized protein          | 0       | 0         | 0        | 0        | 7.94E+06 | 7.78E+06  | 5.30E+07 | 4.37E+06 | 1.27E+09 | 1.29E+08    | 2    |
| L51  | Uncharacterized protein          | 0       | 0         | 6.87E+08 | 5.40E+07 | 7.52E+08 | 1.98E+08  | 6.52E+08 | 1.13E+08 | 7.50E+07 | 3.75E+07    | 2    |
| L360 | Uncharacterized protein          | 1.3E+08 | 1.3E+08   | 5.47E+07 | 8.83E+06 | 4.17E+07 | 1.76E+07  | 3.15E+08 | 4.54E+07 | 2.28E+09 | 3.36E+08    | 2    |
| L175 | Uncharacterized protein          | 0       | 0         | 3.16E+08 | 1.71E+07 | 6.71E+08 | 3.19E+08  | 1.73E+08 | 6.64E+07 | 2.52E+06 | 2.52E+06    | 2    |
| R640 | Uncharacterized protein          | 0       | 0         | 5.03E+07 | 5.03E+07 | 1.63E+07 | 9.19E+06  | 1.47E+08 | 3.83E+07 | 5.05E+08 | 1.22E+08    | 2    |
| R558 | Uncharacterized protein          | 0       | 0         | 7.48E+06 | 6.96E+06 | 2.08E+05 | 2.08E+05  | 2.95E+08 | 3.61E+07 | 6.80E+07 | 6.59E+07    | 2    |
| R348 | Uncharacterized protein          | 0       | 0         | 0        | 0        | 3.64E+08 | 1.54E+08  | 4.20E+08 | 7.73E+07 | 2.82E+07 | 2.80E+07    | 2    |
| L7   | Uncharacterized protein          | 3589833 | 3589833   | 2.31E+08 | 2.86E+07 | 3.81E+09 | 2.32E+08  | 4.77E+09 | 4.26E+08 | 3.49E+08 | 1.35E+08    | 2    |
| L178 | Uncharacterized protein          | 0       | 0         | 7.02E+07 | 1.67E+07 | 7.45E+08 | 3.87E+08  | 7.66E+07 | 1.70E+07 | 1.13E+07 | 5.65E+06    | 2    |
| L697 | Uncharacterized protein          | 0       | 0         | 5.41E+07 | 3.37E+06 | 6.77E+08 | 2.04E+08  | 6.13E+08 | 9.13E+07 | 1.14E+07 | 5.68E+06    | 2    |
| L426 | Uncharacterized protein          | 0       | 0         | 2.48E+07 | 2.48E+07 | 3.86E+08 | 2.63E+08  | 3.82E+08 | 6.79E+07 | 1.90E+05 | 1.90E+05    | 2    |
| R24  | Uncharacterized protein          | 1E+07   | 1E+07     | 7.08E+06 | 7.08E+06 | 4.99E+08 | 1.91E+08  | 5.32E+08 | 9.87E+07 | 9.97E+07 | 9.36E+06    | 2    |
| R554 | Uncharacterized protein          | 1.4E+07 | 1.4E+07   | 2.39E+08 | 4.55E+07 | 1.52E+09 | 5.48E+08  | 5.65E+08 | 9.34E+07 | 1.20E+08 | 9.18E+07    | 2    |
| L531 | Uncharacterized protein          | 6.5E+07 | 6.5E+07   | 1.96E+08 | 9.61E+07 | 7.53E+08 | 3.70E+08  | 1.95E+08 | 3.60E+07 | 0        | 0           | 2    |
| L6   | Uncharacterized protein          | 0       | 0         | 1.90E+08 | 2.03E+07 | 2.90E+09 | 1.26E+09  | 1.02E+09 | 1.19E+08 | 8.59E+07 | 5.54E+07    | 2    |
| L285 | Uncharacterized protein          | 496478  | 496478    | 0        | 0        | 8.89E+08 | 3.79E+08  | 9.46E+08 | 1.49E+08 | 1.70E+07 | 1.02E+07    | 2    |
| L698 | Uncharacterized protein          | 0       | 0         | 7.47E+08 | 1.56E+08 | 1.97E+08 | 1.76E+07  | 0        | 0        | 0        | 0           | 2    |
| L851 | Uncharacterized protein          | 0       | 0         | 2.20E+05 | 2.20E+05 | 1.20E+07 | 1.20E+07  | 0        | 0        | 7.07E+08 | 2.21E+08    | 2    |
| L310 | Uncharacterized protein (1 TMD ) | 0       | 0         | 0        | 0        | 4.12E+06 | 4.12E+06  | 9.42E+07 | 3.29E+07 | 9.80E+08 | 2.03E+08    | 2    |
| L544 | Uncharacterized protein          | 543172  | 543172    | 0        | 0        | 0        | 0         | 0        | 0        | 7.39E+08 | 1.25E+08    | 2    |
| R643 | Uncharacterized protein          | 0       | 0         | 0        | 0        | 0        | 0         | 0        | 0        | 5.52E+08 | 2.84E+08    | 2    |

**Supplementary Table 1.** Mass spectroscopy intensities of proteins identified in 4h, 5.5h, 7h PI viral factories, and mature virions. Protein intensity is the sum of the three most abundant unique peptides (if only two unique peptides are detected then the sum of the two is the protein intensity). Intensities have arbitrary units and are derived from averaging mass spectroscopy intensities from three biological repeats with their standard errors (SE). The number of peptides refers to the overall combined number of peptides identified from a certain protein after processing all experiments using ion chromatogram alignment as typically done in label-free quantitative proteomics. Only proteins identified by at least two unique peptides and their intensities were at least twice higher than in mock-infection, were included in the table. Notably, only DNA topoisomerase 2 has three shared peptides with the host. All other proteins do not have any shared peptides. (TMD): number of trans-membrane domains as predicted by SwissProt.

**Supplementary Table 2.** Proteins content in viral factories as well and in virions

| Gene | Function                                          | 4h | 5.5h | 7h | Virion |
|------|---------------------------------------------------|----|------|----|--------|
| L484 | Putative ankyrin repeat protein                   |    |      | +  | +      |
| L279 | Putative ankyrin repeat protein                   | +  | +    | +  | +      |
| L371 | Putative ankyrin repeat protein                   |    |      |    | +      |
| R601 | Putative ankyrin repeat protein                   | +  | +    | +  |        |
| R597 | Putative ankyrin repeat protein                   | +  | +    |    |        |
| R841 | Putative ankyrin repeat protein                   |    | +    |    |        |
| L56  | Putative ankyrin repeat protein                   | +  | +    | +  |        |
| R579 | Putative ankyrin repeat protein                   | +  | +    | +  |        |
| L66  | Putative ankyrin repeat protein                   | +  | +    | +  | +      |
| R602 | Putative ankyrin repeat protein                   | +  | +    | +  |        |
| R96  | Putative ankyrin repeat protein                   | +  | +    | +  | +      |
| R603 | Putative ankyrin repeat protein                   | +  | +    | +  | +      |
| L483 | Putative ankyrin repeat protein                   |    | +    | +  |        |
| L45  | Putative ankyrin repeat protein                   | +  | +    | +  | +      |
| R634 | Putative ankyrin repeat protein                   | +  | +    | +  | +      |
| R835 | Putative ankyrin repeat protein                   | +  | +    | +  | +      |
| R551 | Putative ankyrin repeat protein                   | +  | +    | +  | +      |
| L774 | Putative ankyrin repeat protein                   | +  | +    | +  |        |
| R840 | Putative ankyrin repeat protein                   |    | +    | +  | +      |
| R322 | DNA polymerase                                    | +  | +    | +  |        |
| R411 | Putative replication factor C large subunit       | +  | +    | +  |        |
| R510 | Putative replication factor C small subunit       |    | +    | +  |        |
| R395 | Putative replication factor C small subunit       | +  | +    | +  |        |
| R303 | DNA ligase                                        | +  | +    | +  | +      |
| R545 | HMG box-containing protein                        | +  | +    | +  | +      |
| L478 | Putative replication factor C small subunit       | +  | +    | +  | +      |
| L499 | Putative replication factor C small subunit       |    | +    | +  |        |
| L318 | Probable DNA polymerase family X                  |    | +    | +  | +      |
| L247 | HNH endonuclease                                  | +  | +    | +  |        |
| R493 | Probable DNA polymerase sliding clamp             | +  | +    | +  | +      |
| R771 | Putative resolvase                                | +  | +    | +  | +      |
| L79  | Putative transposase                              | +  | +    | +  | +      |
| L823 | Putative proliferating cell nuclear antigen       | +  | +    | +  | +      |
| L245 | HNH endonuclease                                  | +  | +    | +  | +      |
| R555 | Mre11/Rad50 fusion proteins                       |    | +    | +  |        |
| L359 | Putative DNA mismatch repair protein mutS homolog | +  | +    | +  |        |
| L315 | Probable formamidopyrimidine-DNA glycosylase      |    | +    | +  | +      |

| Gene      | Function                                      | 4h | 5.5h | 7h | Virion |
|-----------|-----------------------------------------------|----|------|----|--------|
| L386      | Putative endonuclease XPG family              | +  | +    | +  | +      |
| L687      | Putative UV-damage endonuclease               | +  | +    | +  | +      |
| R480      | DNA topoisomerase 2                           | +  | +    | +  | +      |
| R345      | Putative regulator of chromosome condensation |    |      | +  | +      |
| L221      | DNA topoisomerase 1 type prokaryotic          | +  | +    | +  | +      |
| R194      | DNA topoisomerase 1B                          | +  | +    | +  | +      |
| L725      | Uncharacterized protein                       |    | +    | +  | +      |
| L829      | Uncharacterized protein                       | +  |      | +  | +      |
| R135      | Putative GMC-type oxidoreductase              |    |      |    | +      |
| L444      | Putative ADP-ribosyl glycohydrolase           | +  | +    | +  | +      |
| R707      | P13-like protein                              | +  | +    | +  | +      |
| L373      | Glycosyltransferase                           | +  | +    | +  | +      |
| L377      | Putative ATP-dependent RNA helicase           | +  | +    | +  | +      |
| L206/L207 | Putative helicase                             | +  | +    | +  |        |
| R350      | Putative ATP-dependent RNA helicase           | +  | +    | +  | +      |
| L540      | Putative ATP-dependent RNA helicase           |    |      | +  | +      |
| R366      | Putative ATP-dependent RNA helicase           | +  | +    |    | +      |
| R592      | Putative helicase                             | +  | +    | +  |        |
| R568      | Putative ATP-dependent DNA helicase           | +  | +    | +  | +      |
| L115      | Putative helicase                             |    | +    | +  |        |
| R563      | Putative ATP-dependent RNA helicase           |    |      | +  | +      |
| L538      | Putative ATP-dependent RNA helicase           | +  |      |    | +      |
| L396      | Putative ATP-dependent RNA helicase           | +  | +    | +  |        |
| R290      | Putative ATP-dependent RNA helicase           | +  | +    | +  | +      |
| R458      | Putative helicase                             | +  | +    |    |        |
| L364      | Putative ATP-dependent RNA helicase           | +  | +    | +  |        |
| R526      | Putative alpha/beta hydrolase                 |    | +    | +  | +      |
| R325      | Metal dependent hydrolase                     | +  | +    | +  | +      |
| L323      | Myristoylated membrane protein                | +  |      | +  | +      |
| R398      | Putative phosphoesterase                      |    |      | +  | +      |
| L446      | Putative patatin-like phospholipase           | +  | +    | +  |        |
| R644      | Phosphatidylethanolamine-binding protein      | +  | +    | +  | +      |
| R877      | Putative lipocalin                            | +  |      | +  | +      |
| L808      | Probable lanosterol 14-alpha demethylase      | +  | +    | +  |        |
| R383      | Putative FtsJ-like methyltransferase          | +  | +    | +  | +      |
| L511      | Putative FtsJ-like methyltransferase          | +  | +    | +  | +      |
| L294      | Kinesin-like protein                          |    | +    | +  | +      |
| R721      | Putative chemotaxis protein CheD              |    | +    |    | +      |
| R528      | Putative 5'-3' exonuclease                    | +  | +    | +  | +      |
| R354      | Putative phage-type endonuclease              |    | +    | +  |        |

| Gene | Function                                                  | 4h | 5.5h | 7h | Virion |
|------|-----------------------------------------------------------|----|------|----|--------|
| R502 | Putative intron encoded endonuclease                      | +  | +    | +  |        |
| R569 | Uncharacterized exonuclease                               | +  | +    | +  |        |
| R512 | Deoxynucleotide monophosphate kinase                      | +  | +    | +  |        |
| L258 | Thymidine kinase                                          | +  | +    | +  |        |
| R497 | Bifunctional dihydrofolate reductase-thymidylate synthase | +  | +    | +  |        |
| R362 | Thioredoxin domain-containing protein                     |    |      | +  | +      |
| R596 | Probable FAD-linked sulfhydryl oxidase                    | +  |      | +  | +      |
| L498 | Probable zinc-type alcohol dehydrogenase-like protein     | +  |      | +  | +      |
| R443 | Thioredoxin domain-containing protein                     |    |      | +  | +      |
| R195 | Probable glutaredoxin                                     | +  | +    |    | +      |
| R419 | Short-chain type dehydrogenase/reductase                  |    |      |    | +      |
| L894 | Truncated GMC-type inactive oxidoreductase                |    |      |    | +      |
| R368 | Probable FAD-linked sulfhydryl oxidase                    | +  | +    | +  | +      |
| R548 | Thioredoxin-like protein                                  |    | +    |    | +      |
| L251 | Lon protease homolog                                      | +  | +    | +  | +      |
| R521 | Probable ubiquitin-conjugating enzyme E2                  | +  | +    | +  |        |
| R722 | Putative bifunctional metalloprotease/ubiquitin- ligase   | +  | +    | +  | +      |
| R700 | Serpin-like protein                                       | +  | +    | +  | +      |
| R811 | Putative ariadne-like RING finger protein                 | +  | +    | +  |        |
| R355 | Putative thiol protease                                   | +  | +    | +  | +      |
| L293 | Putative ubiquitin carboxyl-terminal hydrolase            |    |      | +  | +      |
| R337 | Uncharacterized cullin-like protein                       | +  | +    | +  |        |
| L709 | Probable ubiquitin-conjugating enzyme E2                  |    | +    | +  |        |
| L233 | Putative Zinc protease                                    | +  | +    | +  | +      |
| R795 | Probable bifunctional E2/E3 enzyme                        | +  | +    | +  |        |
| L393 | Heat shock 70 kDa protein homolog                         |    | +    | +  |        |
| R445 | Putative J domain-containing protein                      | +  | +    | +  | +      |
| R679 | Putative serine/threonine-protein kinase                  | +  | +    |    | +      |
| L593 | Putative prolyl 4-hydroxylase                             |    |      | +  | +      |
| R400 | Putative serine/threonine-protein kinase                  | +  | +    | +  | +      |
| R301 | Putative serine/threonine-protein kinase                  | +  | +    | +  | +      |
| R306 | Serine/Threonine phosphatase                              |    |      | +  | +      |
| L605 | Structural PPIase-like protein                            |    |      | +  | +      |
| R622 | Putative tyrosine-protein phosphatase                     | +  | +    |    | +      |
| L205 | Putative serine/threonine-protein kinase                  | +  | +    | +  | +      |
| L4   | Putative Kila-N domain-containing protein                 | +  | +    | +  | +      |
| L264 | WD repeat-containing protein                              | +  | +    | +  | +      |
| L520 | Putative BTB/POZ domain-containing protein                | +  | +    | +  | +      |
| L887 | Putative JmjC domain-containing protein                   |    |      | +  | +      |
| R307 | PP2C-like domain-containing protein                       |    | +    | +  | +      |

| Gene | Function                                           | 4h | 5.5h | 7h | Virion |
|------|----------------------------------------------------|----|------|----|--------|
| L775 | Putative PAN domain-containing protein             | +  | +    |    | +      |
| R508 | Putative SWIB domain-containing protein            |    | +    | +  | +      |
| L37  | Putative Kila-N domain-containing protein          | +  | +    | +  |        |
| R486 | Putative PAN domain-containing protein             | +  | +    | +  | +      |
| R878 | Putative Kila-N domain-containing protein          | +  | +    | +  | +      |
| R904 | Putative Kila-N domain-containing protein          | +  | +    | +  |        |
| L394 | Putative HD domain-containing protein              |    | +    | +  |        |
| L89  | Putative BTB/POZ domain-containing protein         | +  | +    | +  | +      |
| L168 | Putative F-box protein                             | +  | +    | +  | +      |
| R850 | Putative sel1-like repeat-containing protein       | +  | +    | +  | +      |
| L410 | Putative core protein                              |    | +    | +  | +      |
| L425 | Capsid protein 1                                   |    |      | +  | +      |
| L71  | Collagen-like protein 1                            |    | +    | +  | +      |
| L669 | Collagen-like protein 7                            | +  | +    | +  | +      |
| L668 | Collagen-like protein 6                            |    | +    | +  | +      |
| R440 | Probable capsid protein 3                          |    | +    | +  | +      |
| R501 | DNA-directed RNA polymerase subunit 1              | +  | +    | +  | +      |
| L244 | DNA-directed RNA polymerase subunit 2              | +  | +    | +  | +      |
| R382 | Probable mRNA-capping enzyme                       | +  | +    | +  | +      |
| R341 | Putative poly(A) polymerase catalytic subunit      |    |      | +  | +      |
| R470 | Putative DNA directed RNA polymerase subunit       | +  | +    | +  | +      |
| L376 | Putative DNA-directed RNA polymerase subunit       | +  | +    | +  | +      |
| L235 | DNA-directed RNA polymerase subunit 5              |    | +    | +  | +      |
| L308 | Putative mRNA capping enzyme                       | +  | +    | +  |        |
| L208 | Putative DNA-dependent RNA polymerase subunit Rpb9 | +  | +    | +  | +      |
| R429 | Putative transcription factor                      |    | +    | +  |        |
| R559 | Uncharacterized HTH-type transcriptional regulator | +  | +    | +  | +      |
| R453 | TATA-box-binding protein-like                      | +  | +    | +  |        |
| R209 | DNA-directed RNA polymerase subunit 6              |    | +    | +  | +      |
| L250 | Putative transcription initiation factor IIB-like  | +  | +    | +  | +      |
| R663 | Arginyl-tRNA synthetase                            | +  | +    | +  |        |
| R639 | Methionyl-tRNA synthetase                          | +  | +    | +  | +      |
| R476 | Putative AAA family ATPase                         | +  | +    | +  |        |
| R584 | N-acetyltransferase                                | +  | +    | +  | +      |
| R624 | Putative GTP-binding protein                       | +  | +    | +  |        |
| L288 | Putative B-type lectin protein                     |    |      | +  | +      |
| R699 | Procollagen-lysine 5-dioxygenase                   |    |      | +  | +      |
| L442 | Uncharacterized protein                            |    | +    | +  | +      |
| R692 | Uncharacterized protein                            |    | +    | +  | +      |
| R472 | Uncharacterized protein                            | +  | +    |    | +      |

| Gene | Function                | 4h | 5.5h | 7h | Virion |
|------|-------------------------|----|------|----|--------|
| L488 | Uncharacterized protein |    | +    | +  | +      |
| L454 | Uncharacterized protein |    |      |    | +      |
| R553 | Uncharacterized protein |    |      | +  | +      |
| R403 | Uncharacterized protein |    | +    | +  | +      |
| R327 | Uncharacterized protein | +  | +    | +  | +      |
| R338 | Uncharacterized protein | +  | +    | +  |        |
| L515 | Uncharacterized protein | +  | +    | +  | +      |
| L567 | Uncharacterized protein |    | +    | +  | +      |
| R253 | Uncharacterized protein |    |      | +  | +      |
| L399 | Uncharacterized protein | +  | +    | +  | +      |
| L452 | Uncharacterized protein |    |      | +  | +      |
| R658 | Uncharacterized protein |    |      | +  | +      |
| R402 | Uncharacterized protein | +  | +    | +  | +      |
| L719 | Uncharacterized protein | +  | +    | +  | +      |
| R347 | Uncharacterized protein |    | +    | +  | +      |
| L417 | Uncharacterized protein |    |      | +  | +      |
| R252 | Uncharacterized protein |    | +    | +  | +      |
| R459 | Uncharacterized protein | +  | +    | +  | +      |
| R387 | Uncharacterized protein |    |      | +  | +      |
| L533 | Uncharacterized protein |    |      |    | +      |
| R561 | Uncharacterized protein | +  | +    | +  |        |
| L552 | Uncharacterized protein |    |      |    | +      |
| R489 | Uncharacterized protein |    | +    | +  | +      |
| R463 | Uncharacterized protein |    |      |    | +      |
| R505 | Uncharacterized protein | +  | +    | +  |        |
| R562 | Uncharacterized protein | +  | +    | +  |        |
| R705 | Uncharacterized protein | +  | +    | +  | +      |
| R610 | Uncharacterized protein |    |      |    | +      |
| R607 | Uncharacterized protein | +  | +    | +  |        |
| L397 | Uncharacterized protein | +  | +    | +  |        |
| L516 | Uncharacterized protein | +  | +    | +  | +      |
| L645 | Uncharacterized protein |    | +    | +  | +      |
| L485 | Uncharacterized protein | +  | +    | +  | +      |
| R653 | Uncharacterized protein | +  | +    | +  | +      |
| L65  | Uncharacterized protein | +  | +    | +  | +      |
| R871 | Uncharacterized protein | +  | +    | +  | +      |
| L611 | Uncharacterized protein | +  | +    | +  | +      |
| L550 | Uncharacterized protein | +  | +    | +  | +      |
| L612 | Uncharacterized protein |    |      | +  | +      |
| L389 | Uncharacterized protein | +  | +    | +  | +      |



| Gene | Function                | 4h | 5.5h | 7h | Virion |
|------|-------------------------|----|------|----|--------|
| L324 | Uncharacterized protein | +  | +    | +  | +      |
| L724 | Uncharacterized protein |    | +    | +  | +      |
| R474 | Uncharacterized protein |    | +    | +  | +      |
| R369 | Uncharacterized protein | +  | +    | +  |        |
| R161 | Uncharacterized protein |    |      | +  | +      |
| R457 | Uncharacterized protein | +  | +    | +  | +      |
| L872 | Uncharacterized protein | +  | +    | +  | +      |
| L201 | Uncharacterized protein | +  | +    | +  |        |
| L712 | Uncharacterized protein | +  | +    | +  |        |
| R557 | Uncharacterized protein | +  | +    | +  | +      |
| L591 | Uncharacterized protein | +  | +    | +  | +      |
| L647 | Uncharacterized protein |    |      | +  | +      |
| R390 | Uncharacterized protein | +  | +    | +  | +      |
| L114 | Uncharacterized protein | +  | +    | +  |        |
| R349 | Uncharacterized protein | +  | +    | +  |        |
| R588 | Uncharacterized protein | +  | +    | +  | +      |
| L586 | Uncharacterized protein |    |      | +  | +      |
| R305 | Uncharacterized protein | +  | +    | +  | +      |
| R326 | Uncharacterized protein | +  |      | +  | +      |
| L330 | Uncharacterized protein |    | +    | +  | +      |
| L357 | Uncharacterized protein |    |      | +  | +      |
| R727 | Uncharacterized protein |    | +    | +  | +      |
| R648 | Uncharacterized protein |    |      | +  | +      |
| L451 | Uncharacterized protein |    | +    | +  |        |
| R530 | Uncharacterized protein | +  | +    | +  |        |
| R160 | Uncharacterized protein | +  |      | +  | +      |
| R706 | Uncharacterized protein |    | +    | +  | +      |
| L701 | Uncharacterized protein |    |      | +  | +      |
| L492 | Uncharacterized protein |    |      | +  | +      |
| R646 | Uncharacterized protein |    |      |    | +      |
| R473 | Uncharacterized protein | +  | +    | +  | +      |
| R217 | Uncharacterized protein |    |      | +  | +      |
| L778 | Uncharacterized protein |    |      | +  | +      |
| L629 | Uncharacterized protein |    |      | +  | +      |
| L116 | Uncharacterized protein | +  | +    | +  | +      |
| R370 | Uncharacterized protein | +  | +    | +  | +      |
| R819 | Uncharacterized protein | +  | +    | +  |        |
| R710 | Uncharacterized protein | +  | +    | +  | +      |
| L448 | Uncharacterized protein | +  |      | +  | +      |
| R623 | Uncharacterized protein |    | +    | +  | +      |

| Gene | Function                | 4h | 5.5h | 7h | Virion |
|------|-------------------------|----|------|----|--------|
| L504 | Uncharacterized protein | +  | +    | +  |        |
| R506 | Uncharacterized protein |    | +    | +  | +      |
| R865 | Uncharacterized protein |    | +    | +  |        |
| L479 | Uncharacterized protein | +  | +    | +  |        |
| L12  | Uncharacterized protein | +  | +    | +  |        |
| L5   | Uncharacterized protein | +  | +    | +  | +      |
| L862 | Uncharacterized protein | +  | +    | +  | +      |
| R816 | Uncharacterized protein | +  |      | +  | +      |
| L690 | Uncharacterized protein |    | +    | +  | +      |
| R714 | Uncharacterized protein |    |      | +  | +      |
| R188 | putative amine oxidase  |    |      |    | +      |
| R821 | Uncharacterized protein |    | +    | +  |        |
| L491 | Uncharacterized protein | +  | +    | +  | +      |
| L684 | Uncharacterized protein |    | +    | +  | +      |
| L184 | Uncharacterized protein | +  | +    | +  | +      |
| R902 | Uncharacterized protein | +  | +    | +  |        |
| L157 | Uncharacterized protein | +  | +    | +  |        |
| R379 | Uncharacterized protein | +  | +    | +  |        |
| L792 | Uncharacterized protein | +  | +    | +  |        |
| R450 | Uncharacterized protein | +  | +    | +  |        |
| L183 | Uncharacterized protein | +  | +    | +  |        |
| L152 | Uncharacterized protein | +  | +    | +  |        |
| R336 | Uncharacterized protein | +  | +    | +  |        |
| R346 | Uncharacterized protein | +  | +    | +  | +      |
| R691 | Uncharacterized protein | +  | +    | +  | +      |
| R424 | Uncharacterized protein | +  | +    | +  | +      |
| R527 | Uncharacterized protein | +  | +    | +  | +      |
| L309 | Uncharacterized protein | +  | +    | +  | +      |
| L539 | Uncharacterized protein |    | +    | +  | +      |
| R372 | Uncharacterized protein | +  | +    | +  | +      |
| L352 | Uncharacterized protein |    | +    | +  | +      |
| R468 | Uncharacterized protein |    |      | +  | +      |
| R353 | Uncharacterized protein | +  | +    |    |        |
| R423 | Uncharacterized protein |    | +    | +  |        |
| R535 | Uncharacterized protein |    | +    | +  | +      |
| L16  | Uncharacterized protein | +  | +    | +  | +      |
| R210 | Uncharacterized protein | +  | +    | +  | +      |
| R503 | Uncharacterized protein | +  | +    | +  | +      |
| R220 | Uncharacterized protein | +  | +    | +  | +      |
| L490 | Uncharacterized protein | +  | +    | +  | +      |

| Gene | Function                | 4h | 5.5h | 7h | Virion |
|------|-------------------------|----|------|----|--------|
| L728 | Uncharacterized protein | +  | +    | +  | +      |
| R866 | Uncharacterized protein | +  | +    | +  | +      |
| L585 | Uncharacterized protein |    | +    | +  | +      |
| R546 | Uncharacterized protein | +  | +    | +  | +      |
| L236 | Uncharacterized protein | +  |      | +  | +      |
| R513 | Uncharacterized protein | +  |      | +  | +      |
| L242 | Uncharacterized protein | +  | +    | +  | +      |
| R735 | Uncharacterized protein | +  | +    | +  | +      |
| R297 | Uncharacterized protein |    | +    | +  | +      |
| R556 | Uncharacterized protein | +  | +    | +  | +      |
| L666 | Uncharacterized protein |    | +    | +  |        |
| L487 | Uncharacterized protein |    | +    | +  |        |
| L537 | Uncharacterized protein |    | +    | +  | +      |
| L262 | Uncharacterized protein | +  | +    | +  |        |
| L333 | Uncharacterized protein | +  | +    |    |        |
| R409 | Uncharacterized protein | +  | +    | +  | +      |
| R746 | Uncharacterized protein | +  | +    | +  | +      |
| R495 | Uncharacterized protein |    | +    | +  | +      |
| L53  | Uncharacterized protein |    | +    | +  | +      |
| L51  | Uncharacterized protein | +  | +    | +  | +      |
| L360 | Uncharacterized protein |    |      | +  | +      |
| L175 | Uncharacterized protein | +  | +    | +  | +      |
| R640 | Uncharacterized protein | +  | +    | +  | +      |
| R558 | Uncharacterized protein | +  | +    | +  | +      |
| R348 | Uncharacterized protein |    | +    | +  | +      |
| L7   | Uncharacterized protein | +  | +    | +  | +      |
| L178 | Uncharacterized protein |    | +    | +  | +      |
| L697 | Uncharacterized protein | +  | +    | +  | +      |
| L426 | Uncharacterized protein |    | +    | +  | +      |
| R24  | Uncharacterized protein |    | +    | +  | +      |
| R554 | Uncharacterized protein | +  | +    | +  | +      |
| L531 | Uncharacterized protein |    | +    | +  |        |
| L6   | Uncharacterized protein | +  | +    | +  | +      |
| L285 | Uncharacterized protein |    | +    | +  | +      |
| L698 | Uncharacterized protein | +  | +    |    |        |
| L851 | Uncharacterized protein | +  | +    |    | +      |
| L310 | Uncharacterized protein |    | +    | +  | +      |
| L544 | Uncharacterized protein |    |      |    | +      |
| R643 | Uncharacterized protein |    |      |    | +      |

**Supplementary Table 2.** Presence of proteins in 4h, 5.5h and 7h PI viral factories as well and in mature virions. Only proteins identified by at least two unique peptides and their intensities were at least twice higher than in non-infected cells (mock) are denoted with +. Venn diagrams in Figure 2 were extracted from this table.
